# Diffusion vs. direct transport in the precision of morphogen readout

Sean Fancher<sup>1,2\*</sup> and Andrew Mugler<sup>1\*</sup>

\*For correspondence:

[sfancher@sas.upenn.edu](mailto:sfancher@sas.upenn.edu) (SF);  
[amugler@purdue.edu](mailto:amugler@purdue.edu) (AM)

<sup>1</sup>Department of Physics and Astronomy, Purdue University, West Lafayette, IN 47907, USA; <sup>2</sup>Department of Physics and Astronomy, University of Pennsylvania, Philadelphia, PA 19104, USA

---

**Abstract** Morphogen profiles allow cells to determine their position within a developing organism, but not all morphogen profiles form by the same mechanism. Here we derive fundamental limits to the precision of morphogen concentration sensing for two canonical mechanisms: the diffusion of morphogen through extracellular space and the direct transport of morphogen from source cell to target cell, e.g., via cytonemes. We find that direct transport establishes a morphogen profile without adding noise in the process. Despite this advantage, we find that for sufficiently large values of profile length, the diffusion mechanism is many times more precise due to a higher refresh rate of morphogen molecules. We predict a profile lengthscale below which direct transport is more precise, and above which diffusion is more precise. This prediction is supported by data from a wide variety of morphogens in developing organisms.

---

## Introduction

Within developing organisms, morphogen profiles provide cells with information about their position relative to other cells. Cells use this information to determine their position with extremely high precision (*Dubuis et al., 2013; Erdmann et al., 2009; Gregor et al., 2007a; Houchmandzadeh et al., 2002; De Lachapelle and Bergmann, 2010*). However, not all morphogen profiles are formed via the same mechanism, and for some profiles the mechanism is still not well understood. One well-known mechanism is the synthesis-diffusion-clearance (SDC) model in which morphogen molecules are produced by localized source cells and diffuse through extracellular space before degrading or being internalized by target cells (*Akiyama and Gibson, 2015; Gierer and Meinhardt, 1972; Lander et al., 2002; Müller et al., 2013; Rogers and Schier, 2011; Wilcockson et al., 2017*). Alternatively, a direct transport (DT) model has been proposed where morphogen molecules travel through protrusions called cytonemes directly from the source cells to the target cells (*Akiyama and Gibson, 2015; Bressloff and Kim, 2018; Kornberg and Roy, 2014; Müller et al., 2013; Wilcockson et al., 2017*). The presence of these two alternative theories raises the question of whether there exists a difference in the performance capabilities between cells utilizing one or the other.

Experiments have shown that morphogen profiles display many characteristics consistent with the SDC model. The concentration of morphogen as a function of distance from the source cells has been observed to follow an exponential distribution for a variety of different morphogens (*Driever and Nüsslein-Volhard, 1988; Houchmandzadeh et al., 2002*). The accumulation times for several morphogens in *Drosophila* have been measured and found to match the predictions made by the SDC model (*Berezkhovskii et al., 2011*). In zebrafish, the molecular dynamics of the morphogen Fgf8 have been measured and found to be consistent with Brownian diffusion through extracellular space (*Yu et al., 2009*). Despite these consistencies, recent experiments have lent support to the theory that morphogen molecules are transported through cytonemes rather than extracellular

43 space. The establishment of the Hedgehog morphogen gradient in *Drosophila* is highly correlated in  
44 both space and time with the formation of cytonemes (*Bischoff et al., 2013*), while Wnt morphogens  
45 have been found to be highly localized around cell protrusions such as cytonemes (*Huang and*  
46 *Kornberg, 2015; Stanganello and Scholpp, 2016*). Theoretical studies of both the SDC and DT  
47 models have examined these measurable effects (*Berezhevskii et al., 2011; Bressloff and Kim,*  
48 *2018; Shvartsman and Baker, 2012; Teimouri and Kolomeisky, 2015, 2016*), but direct comparisons  
49 between the two models have thus far been poorly explored. In particular, it remains unknown  
50 whether one model allows for a cell to sense its local morphogen concentration more precisely than  
51 the other given biological parameters such as the number of cells or the characteristic lengthscale  
52 of the profile.

53 Here we derive fundamental limits to the precision of morphogen concentration sensing for both  
54 the SDC and DT models. We investigate the hypothesis that sensory precision plays a major role in  
55 the selection of a gradient formation mechanism during evolution, and we test this hypothesis by  
56 quantitatively comparing our theory to morphogen data. Intuitively one might expect the DT model  
57 to have less noise due to the fact that molecules are directly deposited at their target. Indeed,  
58 we find below that the noise arises only from molecular production and degradation, with no  
59 additional noise from molecular transport. However, we also find below that for sufficiently large  
60 morphogen profile lengthscales, the SDC model produces less noise than the DT model due to it  
61 being able to achieve a higher effective unique molecule count. By elucidating the competing effects  
62 of profile amplitude, steepness, and noise, we ultimately conclude that there should exist a profile  
63 lengthscale below which the DT model is more precise and above which the SDC mechanism is  
64 more precise. We find that this prediction is quantitatively supported by data from a wide variety  
65 of morphogens, suggesting that readout precision plays an important role in determining the  
66 mechanisms of morphogen profile establishment.

## 67 Results

68 Several past studies have focused on the formation dynamics of morphogen profiles (*Berezhevskii*  
69 *et al., 2011; Bressloff and Kim, 2018; Shvartsman and Baker, 2012; Teimouri and Kolomeisky, 2015,*  
70 *2016*). Here we model profiles in the steady state regime, as most of the experimental measure-  
71 ments to which we will later compare our results were taken during stages when the steady state  
72 approximation is valid (*Grimm et al., 2010; Gregor et al., 2007b; Kicheva et al., 2007; Yu et al., 2009;*  
73 *Kanodia et al., 2009*). Precision depends not only on stochastic fluctuations in the morphogen  
74 concentration, but also on the shape of the mean morphogen profile, as the shape determines  
75 concentration differences between adjacent cells that may adopt different fates. Therefore, as  
76 in past studies (*Gregor et al., 2007a; Tostevin et al., 2007*), we define the precision as  $P = \Delta \bar{m}_j / \sigma_j$ ,  
77 where  $\sigma_j$  is the standard deviation of the number of morphogen molecules arriving at cell  $j$ , and  
78  $\Delta \bar{m}_j = \bar{m}_j - \bar{m}_{j+1}$  is the difference between the molecule number in that cell and the adjacent cell.  
79 As is typical in studies of both the DT (*Teimouri and Kolomeisky, 2015; Bressloff and Kim, 2018*)  
80 and SDC (*Berezhevskii et al., 2011; Shvartsman and Baker, 2012; Teimouri and Kolomeisky, 2016*)  
81 mechanisms, we focus on a one-dimensional line of target cells. However, we derive analogous  
82 results for 2D and 3D systems, and we generally find that the dimensionality does not qualitatively  
83 change our results, as we discuss later. In 1D, cells extend in both directions from the source cell,  
84 with  $N$  cells on each side (Fig. 1).<sup>1</sup>

## 85 Direct Transport Model

86 We first consider the DT case, where morphogen molecules are transported via cytonemes that  
87 connect a single source cell to multiple target cells (Fig. 1A). Cytonemes are tubular protrusions

<sup>1</sup>We note that in the case of the Bicoid morphogen in the *Drosophila* embryo, target cells extend only on one side of the source. This will introduce a factor of 2 in the means of both the DT and SDC models and a factor slightly greater than 2 in the variance of the SDC model. This will not affect the agreement of the Bicoid data with our theory in Fig. 3C.

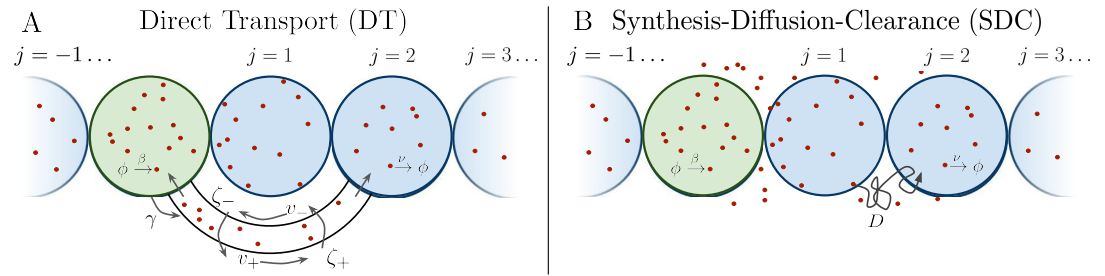

**Figure 1.** Source cell (green) produces morphogen which is delivered to  $N$  target cells (blue) via (A) direct transport (DT) or (B) synthesis-diffusion-clearance (SDC).

88 that are hundreds of nanometers thick and between several and hundreds of microns long (**Ko-**  
 89 **rnberg and Roy, 2014; Kornberg, 2014**). They are supported by actin filaments, and it is thought  
 90 that morphogen molecules are actively transported along the filaments via molecular motors  
 91 (**Kornberg and Roy, 2014; Kornberg, 2014; Sanders et al., 2013; Huang and Kornberg, 2015**). It was  
 92 recently shown that a DT model that includes forward and backward transport of molecules within  
 93 cytonemes reproduces experimentally measured accumulation times (**Teimouri and Kolomeisky,**  
 94 **2015; Bressloff and Kim, 2018**), although the noise properties of this model were not considered.  
 95 Here, we review the steady state properties of this model and derive its noise properties.

96 Consider a single source cell that produces morphogen at rate  $\beta$ . Morphogen molecules enter  
 97 each cytoneme at rate  $\gamma$ . The cytoneme that leads to the  $j$ th target cell has length  $2ja$ , where  $a$  is  
 98 the cell radius. Once inside a cytoneme, morphogen molecules move forward towards the target  
 99 cell with velocity  $v_+$  or backwards toward the source cell with velocity  $v_-$ , and can switch between  
 100 these states with rates  $\zeta_+$  (forward-to-backward) or  $\zeta_-$  (backward-to-forward). Once a molecule  
 101 reaches the forward (backward) end of the cytoneme it is immediately absorbed into the target  
 102 (source) cell. Molecules within a target cell spontaneously degrade with rate  $\nu$ . The dynamics of  
 103 the mean number of morphogen molecules in the source cell  $\bar{m}_0(t)$  and  $j$ th target cell  $\bar{m}_j(t)$ , and the  
 104 mean density of forward-moving molecules  $\bar{u}_j^+(x, t)$  and backward-moving molecules  $\bar{u}_j^-(x, t)$  in the  
 105  $j$ th cytoneme are (**Bressloff and Kim, 2018**)

$$\begin{aligned} \frac{\partial \bar{m}_0}{\partial t} &= \beta - \sum_{j=1}^N \left[ \gamma \bar{m}_0 - v_- \bar{u}_j^-(0, t) \right], \\ \frac{\partial \bar{u}_j^+}{\partial t} &= -v_+ \frac{\partial \bar{u}_j^+}{\partial x} + \zeta_- \bar{u}_j^- - \zeta_+ \bar{u}_j^+ + \gamma \bar{m}_0 \delta(x) - v_+ \bar{u}_j^+ \delta(x - L_j), \\ \frac{\partial \bar{u}_j^-}{\partial t} &= v_- \frac{\partial \bar{u}_j^-}{\partial x} - \zeta_- \bar{u}_j^- + \zeta_+ \bar{u}_j^+ - v_- \bar{u}_j^- \delta(x), \\ \frac{\partial \bar{m}_j}{\partial t} &= v_+ \bar{u}_j^+(L_j, t) - \nu \bar{m}_j. \end{aligned} \quad (1)$$

106 The steady-state solution is (**Bressloff and Kim, 2018**)

$$\bar{m}_j^{\text{DT}} = \frac{\beta \Gamma_j}{\nu \sum_{k=1}^N \Gamma_k}, \quad \text{where } \Gamma_j = \frac{e^{-2j\kappa a}(1 - e^{-\phi})}{1 - e^{-\phi - 2j\kappa a}}. \quad (2)$$

107 Here  $\gamma \Gamma_j$  is the effective transport rate of morphogen molecules to the  $j$ th target cell, and  $\phi =$   
 108  $\log(d_-/d_+)$  and  $\kappa = d_+^{-1} - d_-^{-1}$  are defined in terms of the average distance a molecule would move  
 109 forward  $d_+ = v_+/\zeta_+$  or backward  $d_- = v_-/\zeta_-$  within a cytoneme before switching direction. The  
 110 parameter  $\phi$  sets the shape of  $\Gamma_j$ , and thus of  $\bar{m}_j$ : when  $\phi \ll -1$  the profile is constant,  $\Gamma_j = 1$ ; when  
 111  $\phi \gg 1$  it is exponential,  $\Gamma_j = e^{-2ja/d_+}$ ; and when  $|\phi| \ll 1$  it is a power law for large  $j$ ,  $\Gamma_j = (1 + 2ja/d_+)^{-1}$ .

112 The parameter  $\kappa$  sets the lengthscale of the profile, defined as

$$\lambda_{\text{DT}} = \sum_{j=1}^N \frac{\Gamma_j - \Gamma_N}{\Gamma_1 - \Gamma_N} \approx \frac{1}{|\kappa|} (e^{|\phi|} - 1) \left( |\phi| - \log(e^{|\phi|} - 1) \right), \quad (3)$$

113 where we approximate the sum as an integral for  $N \gg 1$ . We use this expression to eliminate  $\kappa$ ,  
114 writing  $\Gamma_j$  in Eq. 2 entirely in terms of  $\phi$  and  $\hat{\lambda} \equiv \lambda/a$ .

115 Despite the complexity of the transport process in Eq. 1, we find that it adds no noise to  $m_j$ .  
116 In fact, here we prove that any system in which molecules can only degrade in the target cells  
117 and cannot leave the target cells has the steady-state statistical properties of a simple birth-death  
118 process. First consider the special case of only one target cell. Because each morphogen molecule  
119 produced in the source cell acts independently of every other morphogen molecule, we define  $p(\tau)$   
120 as the probability density that any given molecule will enter the target cell a time  $\tau$  after it is created  
121 in the source cell. Next, we define  $Q(\delta t)$  as the probability that a morphogen molecule will enter the  
122 target cell between  $t$  and  $t + \delta t$ . This event requires the molecule to have been produced between  
123  $t - \tau$  and  $t - (\tau + d\tau)$ , which occurs with probability  $\beta d\tau$ ; to arrive at the target cell a time  $\tau$  later  
124 and to enter the target cell within the window  $\delta t$ , which occurs with probability  $p(\tau)\delta t$ ; and we must  
125 integrate over all possible times  $\tau$ . Therefore,

$$Q(\delta t) = \int_0^\infty [\beta d\tau][p(\tau)\delta t] = \beta \delta t \int_0^\infty d\tau p(\tau) = \beta \delta t, \quad (4)$$

126 where the last step follows from normalization. We see that regardless of the form of  $p(\tau)$ , the  
127 probability of a morphogen molecule entering the target cell in any given small time window  $\delta t$   
128 is simply  $\beta \delta t$ . This result holds regardless of the mechanism by which morphogen molecules go  
129 from the source cell to the target cell, as the only effect such a mechanism can have is on  $p(\tau)$ . This  
130 result still holds when the system is expanded to have multiple target cells, as then  $p(\tau)$  is replaced  
131 with  $p_j(\tau)$ , the probability density that the molecule enters the  $j$ th target cell a time  $\tau$  after being  
132 produced. In this case,  $\int_0^\infty d\tau p_j(\tau)$  evaluates to  $\pi_j$ , the total probability the morphogen molecule is  
133 ultimately transported to the  $j$ th target cell, and  $\beta \delta t$  is simply replaced with  $\beta \pi_j \delta t$ . Combined with  
134 the constant degradation rate  $\nu$  of morphogen molecules within the target cell, this is precisely a  
135 birth-death process with birth rate  $\beta \pi_j$  and death rate  $\nu$ . For our system  $\pi_j = \Gamma_j / \sum_{k=1}^N \Gamma_k$  in Eq. 2.

136 We now assume that each cell integrates its morphogen molecule count over a time  $T$  (**Berg**  
137 **and Purcell, 1977; Gregor et al., 2007a**). The variance in the time average  $T^{-1} \int_0^T dt m_j(t)$  is simply  
138 that of a birth-death process, given by  $\sigma_j^2 = 2\bar{m}_j/(T/\tau)$  (**Fancher and Mugler, 2017**), so long as  $T \gg \tau$ ,  
139 where  $\tau = \nu^{-1}$  is the correlation time. We see that, as expected for a time-averaged Poisson process,  
140 the variance increases with the mean  $\bar{m}_j$  and decreases with the number  $T/\tau$  of independent  
141 measurements made in the time  $T$ . The precision is therefore

$$P_{\text{DT}}^2 = \frac{\bar{m}_j^{\text{DT}} T}{2\tau_{\text{DT}}} \left( \frac{\Delta \bar{m}_j^{\text{DT}}}{\bar{m}_j^{\text{DT}}} \right)^2, \quad \text{with } \tau_{\text{DT}} = \frac{1}{\nu}. \quad (5)$$

142 We see that the precision increases with the profile amplitude  $\bar{m}_j$ , the number of independent  
143 measurements  $T/\tau$ , and the profile steepness  $\Delta \bar{m}_j / \bar{m}_j$ . The transport process influences the  
144 precision only via  $\bar{m}_j$ , not  $\tau$ . For a given  $N$ ,  $j$ , and  $\hat{\lambda}$ , we find that the precision is maximized at a  
145 particular  $\phi^* > 0$  (Fig. 2A). The reason is that an exponential profile ( $\phi \gg 1$ ) has constant steepness  
146 but small amplitude, whereas a power-law profile ( $\phi \ll 1$ ) has low steepness but large amplitude  
147 due to its long tail; the optimum is in between.

### 148 Synthesis-Diffusion-Clearance Model

149 We next consider the SDC case (Fig. 1B). Again a single source cell at the origin  $x = 0$  produces  
150 morphogen at rate  $\beta$ . However, now morphogen molecules diffuse freely along  $x$  with coefficient

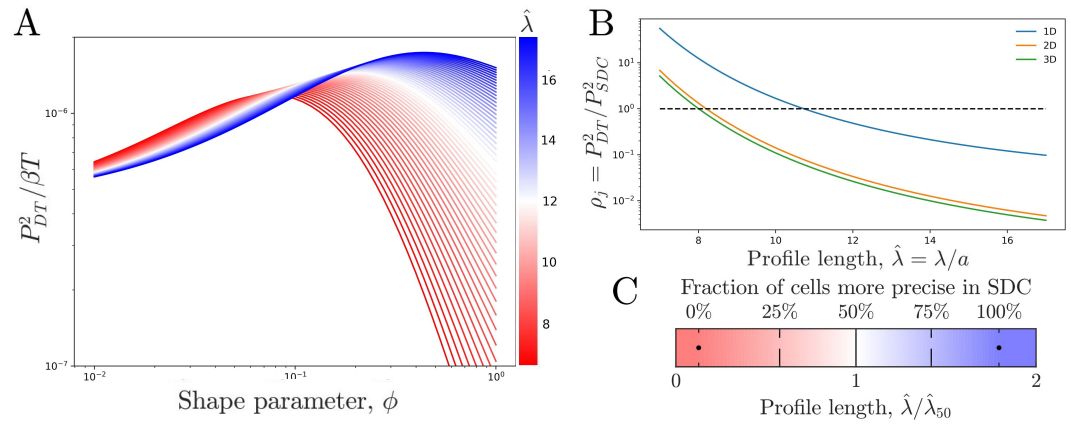

**Figure 2.** Comparing theoretical DT precision to SDC precision for a single cell. (A) DT precision shows a maximum as a function of shape parameter  $\phi$  for any value of the profile lengthscale. (B) Ratio  $\rho_j$  of DT to SDC precision shows a crossover ( $\rho_j = 1$ ) as a function of profile lengthscale  $\lambda/a$  for 1D, 2D, and 3D geometries. Here  $j = 50$  is the central cell of  $N = 100$  target cells. (C) Percentage of cells for which SDC is more precise ( $\rho_j < 1$ ) in 1D for  $N = 100$ .

151  $D$  and degrade spontaneously at any point in space with rate  $\nu$ . The dynamics of the morphogen  
 152 concentration  $c(x, t)$  are

$$\frac{\partial c}{\partial t} = D\nabla^2 c + \eta_D - \nu c - \eta_\nu + (\beta + \eta_\beta) \delta(x), \quad (6)$$

153 where the noise terms associated with diffusion, degradation, and production obey

$$\begin{aligned} \langle \eta_D(x', t') \eta_D(x, t) \rangle &= 2D\delta(t-t') \vec{\nabla}_x \cdot \vec{\nabla}_{x'} \bar{c}(x) \delta(x-x') \\ \langle \eta_\nu(x', t') \eta_\nu(x, t) \rangle &= \nu \bar{c}(x) \delta(t-t') \delta(x-x'), \\ \langle \eta_\beta(t') \eta_\beta(t) \rangle &= \beta \delta(t-t'), \end{aligned} \quad (7)$$

154 respectively (Gardiner, 2004; Gillespie, 2000; Fancher and Mugler, 2017; Varennes et al., 2017).  
 155 Here  $\bar{c}(x) = \beta e^{-x/\lambda} / (\nu\lambda)$  is the steady state mean concentration, with characteristic lengthscale  
 156  $\lambda_{SDC} = \sqrt{D/\nu}$ . We imagine a target cell located at  $x$  that is permeable to the morphogen and  
 157 counts the number  $m(x, t) = \int_V dy c(x+y, t)$  of morphogen molecules within its volume  $V$ . We  
 158 use this simpler prescription over explicitly accounting for more realistic mechanisms such as  
 159 surface receptor binding because it has been shown that the two approaches ultimately yield  
 160 similar concentration sensing results up to a factor of order unity (Berg and Purcell, 1977). For a  
 161 cell at position  $x = 2ja$ , the integral evaluates to

$$\bar{m}_j^{SDC} = 2(\beta/\nu) \sinh(1/\hat{\lambda}) e^{-2j/\hat{\lambda}} \quad (8)$$

162 in steady state.

163 Because Eq. 6 is linear with Gaussian white noise, calculating the time-averaged variance  $\sigma_j^2$   
 164 is straightforward: we Fourier transform Eq. 6 in space and time, calculate the power spectrum  
 165 of  $m(x, t)$ , and take its low-frequency limit (Appendix 1). So long as  $T \gg \nu^{-1}$ , we obtain the same  
 166 functional form as Eq. 5,

$$P_{SDC}^2 = \frac{\bar{m}_j^{SDC} T}{2\tau_{SDC}} \left( \frac{\Delta \bar{m}_j^{SDC}}{\bar{m}_j^{SDC}} \right)^2, \quad (9)$$

167 because diffusion is a Poisson process. However, here the correlation time is

$$\tau_{\text{SDC}} = \frac{1}{\nu} \left[ 1 - \frac{(2/\hat{\lambda}) + \sinh(2/\hat{\lambda})}{4 \sinh(1/\hat{\lambda})e^{1/\hat{\lambda}}} \right]. \quad (10)$$

168 The factor in brackets is always less than one and decreases with  $\hat{\lambda}$ . It reflects the fact that, unlike  
 169 in the DT model, molecules can leave a target cell not only by degradation, but also by diffusion.  
 170 Therefore, the rate  $\tau^{-1}$  at which molecules are refreshed is larger than that from degradation alone.  
 171 This effect increases the precision because more independent measurements  $T/\tau$  can be made.

172 To understand this effect more intuitively, consider a simplified SDC model in which diffusion is  
 173 modeled as discrete hopping between adjacent target cells at rate  $h$ . The autocorrelation function  
 174 is  $C_j(t) = \bar{m}_j I_0(2ht)e^{-(2h+\nu)t}$  (Appendix 2), where  $I_0$  is the zeroth modified Bessel function of the first  
 175 kind. The correlation time is  $\tau = \int_0^\infty dt C_j(t)/C_j(0) = [\nu(4h + \nu)]^{-1/2}$ , and we see explicitly that it  
 176 decreases with both degradation ( $\nu$ ) and diffusion ( $h$ ). In fact, in the limit of fast diffusion ( $h \gg \nu$ ),  
 177 the expression becomes  $\tau = (4\nu h)^{-1/2}$ . Correspondingly, in the fast-diffusion limit of Eq. 10 ( $\hat{\lambda} \gg 1$ ),  
 178 the term in brackets reduces to  $\hat{\lambda}^{-1}$ , and it becomes  $\tau = (\nu\hat{\lambda})^{-1/2} = [4\nu D/(2a)^2]^{-1/2}$ . These expressions  
 179 are identical, with  $D/(2a)^2$  playing the role of the hopping rate  $h$ , as expected.

### 180 Comparing the models

181 We now ask which model has higher precision. We calculate the precision ratio  $\rho_j = P_{\text{DT}}^2/P_{\text{SDC}}^2$  in  
 182 the  $j$ th target cell from Eqs. 2, 5, and 8-10, which depends on  $j$ ,  $N$ ,  $\hat{\lambda}$ , and  $\phi$ . Fig. 2B shows  $\rho_j$  as a  
 183 function of profile length  $\hat{\lambda}$  for a cell in the center ( $j = N/2$ ) of a line of  $N = 100$  target cells, where  
 184 for each  $\hat{\lambda}$  we use the  $\phi^*$  that maximizes  $P_{\text{DT}}^2$ , as seen in Fig. 2A. We see that for short profiles the  
 185 DT model is more precise ( $\rho_j > 1$ ) whereas for long profiles the SDC model is more precise ( $\rho_j < 1$ ).  
 186 This effect holds for a single source cell providing morphogen for a 1D line of target cells as well as  
 187 for a 1D line of source cells with a 2D sheet of target cells and a 2D sheet of source cells with a 3D  
 188 volume of target cells.<sup>2</sup>

189 Fig. 2C shows similar information as Fig. 2B but for all target cells in the line. Specifically, at each  
 190  $\hat{\lambda}$  value, we find the  $\phi^*$  value that maximizes the percentage of cells for which the DT model is more  
 191 precise. The color shows the complement: the percentage of cells for which the SDC model is more  
 192 precise. We normalize the  $\hat{\lambda}$  axis by  $\hat{\lambda}_{50}$ , the value at which this percentage is 50%. As expected, we  
 193 see that for short profile lengths the DT model is more precise in the majority of cells, whereas for  
 194 long profiles the SDC model is more precise in the majority of cells.

195 The reason that the SDC model is more precise for long profiles is that long profiles correspond  
 196 to fast diffusion, which increases the refresh rate  $\tau_{\text{SDC}}^{-1}$  as discussed above. Conversely, the reason  
 197 that that the DT model is more precise for short profiles is that it has a larger amplitude. It also has  
 198 a smaller steepness, but the larger amplitude wins out. Specifically, whereas the SDC amplitude  
 199 falls off exponentially,  $\bar{m}_j \sim e^{-2j/\hat{\lambda}}$ , for sufficiently small  $\phi^*$  the DT amplitude falls off as a power law,  
 200  $\bar{m}_j \sim 1/j$ . The steepness  $\Delta\bar{m}_j/\bar{m}_j$  of the SDC profile is constant, while the steepness of the DT profile  
 201 also scales like  $1/j$ . Thus, the product of the ratio of amplitudes and the square of the ratio of  
 202 steepnesses, on which  $\rho_j$  depends, scales like  $e^{2j/\hat{\lambda}}/j^3$ . For small  $\hat{\lambda}$ , the exponential dominates over  
 203 the cubic for the majority of  $j$  values. Consequently, the DT model has the higher precision.

### 204 Comparison to Data

205 We now test our predictions against data for various morphogens. In *Drosophila*, the morphogen  
 206 Wingless (Wg) is localized near cell protrusions such as cytonemes (*Huang and Kornberg, 2015*;  
 207 *Stanganello and Scholpp, 2016*), and the Hedgehog (Hh) gradient correlates highly in both space  
 208 and time with the formation of cytonemes (*Bischoff et al., 2013*), suggesting that these two mor-  
 209 phogen profiles are formed via a DT mechanism. Conversely, Bicoid has been understood as  
 210 a model example of SDC for decades (*Driever and Nüsslein-Volhard, 1988*; *Gregor et al., 2007a*;

<sup>2</sup>For the DT model, the 2D and 3D cases are identical to the 1D case as we assume that cytonemes extend perpendicular to the source cells; for the SDC model see Appendix 1.

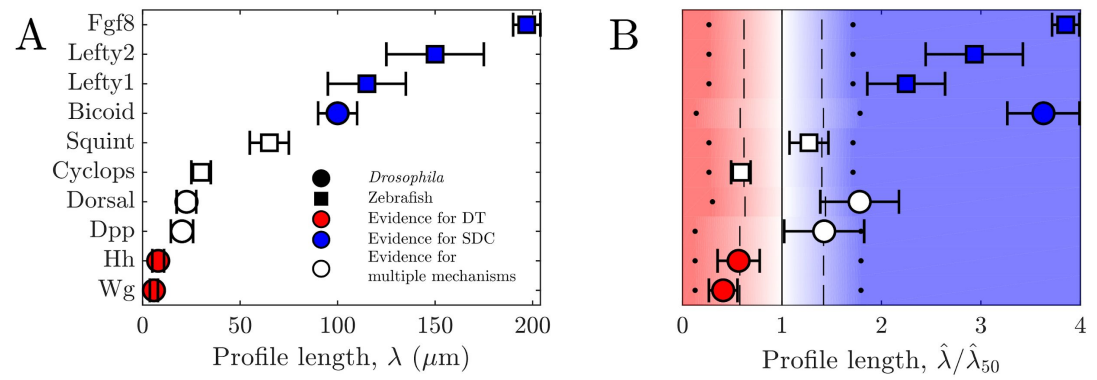

**Figure 3.** Comparing theory and experiment. (A)  $\lambda$  values for morphogens estimated from experiments, colored by whether experiments support a DT (red), SDC (blue), or multiple mechanisms (white). (B) Data from A overlaid with color from theory using values of  $a$  and  $N$  estimated from experiments. Color is as in Fig. 2C indicating percentage of cells for which SDC is predicted to be more precise.

211 *Houchmandzadeh et al., 2002*). Similarly, Dorsal is spread by diffusion, however its absorption is  
 212 localized to a specific region of target cells via a nonuniform degradation mechanism, making it  
 213 more complex than the simple SDC model (*Carrell et al., 2017*). Finally, for Dpp there is evidence  
 214 for a variety of different gradient formation mechanisms (*Akiyama and Gibson, 2015; Müller et al.,*  
 215 *2013; Wilcockson et al., 2017*).

216 In zebrafish, the morphogen Fgf8 has been studied at the single molecule level and found to have  
 217 molecular dynamics closely matching the Brownian movement expected in an SDC mechanism  
 218 (*Yu et al., 2009*). Similarly, Cyclops, Squint, Lefty1, and Lefty2, all of which are involved in the  
 219 Nodal/Lefty system, have been shown to spread diffusively and affect cells distant from their source  
 220 (*Müller et al., 2013; Rogers and Müller, 2018*). This would support the SDC mechanism, although  
 221 Cyclops and Squint have been argued to be tightly regulated via a Gierer-Meinhardt type system,  
 222 thus diminishing their gradient sizes to values much lower than what they would be without this  
 223 regulation (*Gierer and Meinhardt, 1972; Rogers and Müller, 2018*).

224 For all of these morphogens, we estimate the profile lengthscales  $\lambda$  from the experimental  
 225 data (*Kicheva et al., 2007; Wartlick et al., 2011; Gregor et al., 2007b,a; Liberman et al., 2009; Yu*  
 226 *et al., 2009; Müller et al., 2012*) (Appendix 3). Fig. 3A shows these  $\lambda$  values and indicates for  
 227 each morphogen whether the evidence described above suggests a DT mechanism (red), an SDC  
 228 mechanism (blue), or multiple mechanisms including DT and SDC (white). We see that in general,  
 229 the three cases correspond to short, long, and intermediate profile lengths, respectively, which is  
 230 qualitatively consistent with our predictions.

231 To make the comparison quantitative, we estimate the values of cell radius  $a$  and cell number  
 232  $N$  from the experimental data (*Kicheva et al., 2007; Gregor et al., 2007a; Liberman et al., 2009; Yu*  
 233 *et al., 2009; Kimmel et al., 1995*) (Appendix 3) in order to calculate  $\rho_j$  from our theory in each case.  
 234 The background color in Fig. 3B shows the percentage of cells for which we predict that the SDC  
 235 model is more precise as a function of  $\hat{\lambda}$  as in Fig. 2C. The data points in Fig. 3B show the values of  $\hat{\lambda}$   
 236 from the experiments, also normalized by  $\hat{\lambda}_{50}$  from the theory. For each morphogen species we  
 237 assume a 1D system for simplicity as we have checked that considering higher dimensions yields  
 238 negligible differences to the results presented in Fig. 3B. We see that our theory predicts the correct  
 239 threshold: the morphogens for which the evidence suggests either a DT or an SDC mechanism (red  
 240 or blue) fall into the regime in which we predict that mechanism to be more precise for most of the  
 241 cells, and the morphogens with multiple mechanisms (white) fall in between. This result provides  
 242 quantitative support for the idea that morphogen profiles form according to the mechanism that  
 243 maximizes the sensory precision of the target cells.

## 244 Discussion

245 We have shown that in the steady-state regime, the DT and SDC models of morphogen profile  
246 formation yield different scalings of readout precision with the length of the profile and population  
247 size. As a result, there exist regimes in this parameter space in which either mechanism is more  
248 precise. While the DT model benefits from larger molecule numbers and no added noise from the  
249 transport process, the ability of molecules to diffuse into and away from a target cell in the SDC  
250 model allows the cell to measure a greater number of effectively unique molecules in the same  
251 time frame. By examining how these phenomena affect the cells' sensory precision, we predicted  
252 that morphogen profiles with shorter lengths should utilize cytonemes or some other form of  
253 direct transport mechanism, whereas morphogens with longer profiles should rely on extracellular  
254 diffusion, a prediction that is in quantitative agreement with measurements on known morphogens.  
255 It will be interesting to observe whether this trend is further strengthened as more experimental  
256 evidence is obtained for different morphogens, as well as to expand the theory of multicellular  
257 concentration sensing to further biological contexts.

258 Despite the quantitative agreement between our theory and experiments, it is clear that the  
259 models presented here are minimal and thus cannot be directly applied to all systems. This is  
260 exemplified by morphogen such as Dorsal, which due to aforementioned diffusive spreading and  
261 nonuniform degradation mechanism clearly does not strictly follow either model. Additionally,  
262 the SDC model can be violated if the diffusion of morphogen through a biological environment is  
263 hindered by the typically crowded nature of such environments, leading to possibly subdiffusive  
264 behavior (*Ellery et al., 2014; Fanelli and McKane, 2010*). For the DT model, we explicitly ignored the  
265 dynamics of the cytonemes themselves due to the growth rate of the cytonemes being sufficiently  
266 fast so as to traverse the entire system size in significantly less time than is required for the cells to  
267 integrate their morphogen counts over (*Bischoff et al., 2013; Chen et al., 2017*). This assumption  
268 is problematic if cytonemes continue to behave dynamically after reaching the source cell. In  
269 particular, the process of cytonemes switching between phases of growing and retracting can  
270 introduce super-Poissonian noise sources to the morphogen count within the target cells. It will be  
271 interesting to explore the implications of each of these complications in future works.

## 272 Acknowledgments

273 We thank Chris Bairnsfather for useful discussions.

## 274 Appendix 1: Time-averaged variance in the SDC model

275 Here we calculate the time-averaged variance of the morphogen molecule number using the  
276 low-frequency limit of the power spectrum. We first introduce the power spectrum, and then we  
277 calculate the variance for the 1D, 2D, and 3D geometries.

### 278 Power Spectrum

279 We first discuss the correlation function and power spectrum to establish some definitions and  
280 notation. Specifically, we show that the variance in the long-time average of a variable is given by  
281 the low-frequency limit of its power spectrum. For a one dimensional function  $x(t)$  with mean 0, the  
282 correlation function  $C(t)$  takes the form

$$C(t-t') = \langle x(t') x(t) \rangle. \quad (11)$$

283 Since absolute time is irrelevant in the steady state of any physical system with no time dependent  
284 forcing,  $t'$  can be set to 0 without loss of generality. This leads to a definition for the power spectrum  
285 of  $x(t)$  as



$$\begin{aligned}
 S(\omega) &= \int \frac{d\omega'}{2\pi} \langle \tilde{x}^*(\omega') \tilde{x}(\omega) \rangle = \frac{1}{2\pi} \int d\omega' dt dt' \langle x(t') x(t) \rangle e^{i\omega t} e^{-i\omega' t'} \\
 &= \int dt dt' C(t-t') e^{i\omega t} \delta(t') = \int dt C(t) e^{i\omega t}.
 \end{aligned} \tag{12}$$

286 Thus, under this definition the power spectrum is seen to be the Fourier transform of the correlation  
 287 function. Additionally, when  $x(t)$  is averaged over a time  $T$ , the time averaged correlation function  
 288 of  $x(t)$  takes the form

$$\begin{aligned}
 C_T(t-t') &= \left\langle \left( \frac{1}{T} \int_{t'}^{t'+T} d\tau' x(\tau') \right) \left( \frac{1}{T} \int_t^{t+T} d\tau x(\tau) \right) \right\rangle \\
 &= \frac{1}{T^2} \int_t^{t+T} d\tau \int_{t'}^{t'+T} d\tau' \langle x(\tau') x(\tau) \rangle \\
 &= \frac{1}{T^2} \int_t^{t+T} d\tau \int_{t'}^{t'+T} d\tau' C(\tau - \tau').
 \end{aligned} \tag{13}$$

289 Let  $y \equiv (\tau - \tau') - (t - t')$  and  $z \equiv (\tau + \tau') - (t + t')$ . This transforms Eq. 13 into

$$\begin{aligned}
 C_T(t-t') &= \frac{1}{T^2} \int_{-T}^T dy \int_{|y|}^{2T-|y|} dz \frac{1}{2} C(y+t-t') \\
 &= \frac{1}{T^2} \int_{-T}^T dy (T-|y|) C(y+t-t').
 \end{aligned} \tag{14}$$

290 By inverting the relationship found in Eq. 12,  $C(y+t-t')$  can be replaced with an inverse Fourier  
 291 transform of  $S(\omega)$  to produce

$$\begin{aligned}
 C_T(t-t') &= \frac{1}{T^2} \int_{-T}^T dy \int \frac{d\omega}{2\pi} (T-|y|) S(\omega) e^{-i\omega(y+t-t')} \\
 &= \int \frac{d\omega}{2\pi} \left( \frac{2}{\omega T} \sin\left(\frac{\omega T}{2}\right) \right)^2 S(\omega) e^{-i\omega(t-t')}.
 \end{aligned} \tag{15}$$

292 The factor of  $(\omega T)^{-2}$  in the integrand of Eq. 15 forces only small values of  $\omega$  to contribute when  
 293  $T$  is large. Thus, the approximation  $S(\omega) \approx S(0)$  can be made since only values of  $\omega$  near 0 are  
 294 contributing. This causes  $C_T(0)$ , which we will denote as  $\sigma^2$  through this and the main text, to be  
 295 exactly calculable to

$$\sigma^2 = C_T(0) \approx S(0) \int \frac{d\omega}{2\pi} \left( \frac{2}{\omega T} \sin\left(\frac{\omega T}{2}\right) \right)^2 = \frac{S(0)}{T}. \tag{16}$$

296 Of important note is the fact that this approximation only works if  $S(\omega)$  varies slowly compared to  
 297  $(2 \sin(\omega T/2)/\omega T)^2$  near  $\omega = 0$ . Since  $C(t)$  must be time symmetric,  $S(\omega)$  must also be symmetric and  
 298 thus an even function of  $\omega$ . Thus, near  $\omega = 0$  the lowest order correction term for each function will  
 299 be the second order term. Normalizing each term by the 0-frequency value of each function then  
 300 lets us to impose the condition

$$\left| \frac{1}{S(0)} \frac{\partial^2 S(\omega)}{\partial \omega^2} \Big|_{\omega=0} \right| \ll \left| \frac{\partial^2}{\partial \omega^2} \left( \frac{2}{\omega T} \sin\left(\frac{\omega T}{2}\right) \right)^2 \Big|_{\omega=0} \right| = \frac{T^2}{6}. \tag{17}$$

301 So long as this condition is satisfied, the approximation given in Eq. 16 is valid.

302 We now cast Eq. 16 into a more intuitive form by considering the correlation time  $\tau$ , which can  
303 be defined as

$$\tau = \int_0^{\infty} dt \frac{C(t)}{C(0)}. \quad (18)$$

304 Continuing the use the fact that  $C(t)$  must be time symmetric and thus an even function of  $t$ , Eq. 12  
305 can be used to produce the result

$$S(0) = \int dt C(t) = 2 \int_0^{\infty} dt C(t) = 2\tau C(0). \quad (19)$$

306 Inserting this result into Eq. 16 produces

$$\sigma^2 \approx \frac{2\tau}{T} C(0), \quad (20)$$

307 thus relating the long-time averaged variance,  $\sigma^2$ , to the instantaneous variance,  $C(0)$ , and the  
308 number of correlation times the system averages over,  $T/\tau$ .

### 309 Variance and precision

310 We now consider a model for the Synthesis-Diffusion-Clearance system. We still assume there is a  
311 single source cell which produces morphogen at rate  $\beta$ , but now the morphogen is released into the  
312 extracellular environment where it freely diffuses at rate  $D$ . The morphogen can also spontaneously  
313 degrade at rate  $\nu$ . Even though in the main text we focus on a zero-dimensional source in a one-  
314 dimensional space, here we will look at diffusion in a multitude of different spaces with different  
315 dimensions as well as morphogen sources that span a multitude of different dimensions. In each  
316 case, the sources will secrete morphogen molecules into a density field  $c$  which must follow

$$\frac{\partial c}{\partial t} = D\nabla^2 c + \eta_D - \nu c - \eta_\nu + (\beta + \eta_\beta) \delta^{SP-SO}(\vec{x}), \quad (21)$$

317 where  $SP$  is the number of spatial dimensions,  $SO$  is the dimensionality of the source, and  $\nabla^2$  is  
318 taken over all  $SP$  dimensions. Each  $\eta$  term is a Langevin noise term that represents Gaussian white  
319 noise for the diffusion, degradation, and production processes respectively. Of important note is  
320 that  $\delta^{SP-SO}(\vec{x})$  is a  $\delta$  function only in the **last**  $SP - SO$  dimensions of the space. So, for example, if  
321 there was a 1 dimensional source in 3 dimensional space, then  $\delta^{3-1}(\vec{x})$  would be a  $\delta$  function in  
322 the  $\hat{y}$  and  $\hat{z}$  directions but not the  $\hat{x}$  direction. This means that  $\beta$  and  $\eta_\beta$  will have units of  $T^{-1}L^{-SO}$ ,  
323 where  $T$  is time and  $L$  is space.

324 We can now assume  $c$  has reached a steady state and separate it into  $c = \bar{c} + \delta c$ , which in turn  
325 allows Eq. 21 to separate into

$$0 = D\nabla^2 \bar{c} - \nu \bar{c} + \beta \delta^{SP-SO}(\vec{x}) \quad (22)$$

$$\frac{\partial \delta c}{\partial t} = D\nabla^2 \delta c + \eta_D - \nu \delta c - \eta_\nu + \eta_\beta \delta^{SP-SO}(\vec{x}). \quad (23)$$

326 Fourier transforming Eq. 22 in space and dividing it by  $\nu$  then yields

$$0 = -\lambda^2 |\vec{k}|^2 \bar{c} - \bar{c} + \frac{\beta}{\nu} (2\pi)^{SO} \delta^{SO}(\vec{k}) \implies \bar{c} = \frac{\beta (2\pi)^{SO} \delta^{SO}(\vec{k})}{\nu (1 + \lambda^2 |\vec{k}|^2)}, \quad (24)$$

327 where

$$\lambda = \sqrt{\frac{D}{\nu}}. \quad (25)$$

328 Of similarly important note is that  $\delta^{SO}(\vec{k})$  is a  $\delta$  function only in the **first**  $SO$  dimensions of  
 329  $k$ -space. So in the 1 dimensional source, 3 dimensional space example  $\delta^{SO}(\vec{k})$  would be a  $\delta$  function  
 330 in the  $\hat{x}$  direction of  $k$ -space but not the  $\hat{y}$  or  $\hat{z}$  directions.

331 This allows  $\bar{c}$  to be written as

$$\begin{aligned}\bar{c}(\vec{x}) &= \int \frac{d^{SP}k}{(2\pi)^{SP}} e^{-i\vec{k}\cdot\vec{x}} \bar{c}(\vec{k}) = \frac{\beta}{v} \int \frac{d^{SP}k}{(2\pi)^{SP}} e^{-i\vec{k}\cdot\vec{x}} \frac{(2\pi)^{SO} \delta^{SO}(\vec{k})}{1 + \lambda^2 |\vec{k}|^2} \\ &= \frac{\beta}{v} \int \frac{d^{SP-SO}k}{(2\pi)^{SP-SO}} e^{-i\vec{k}\cdot\vec{x}} \frac{1}{1 + \lambda^2 |\vec{k}|^2} = \frac{\beta \lambda^{-(SP-SO)}}{v} P_{SP-SO} \left( \frac{|\vec{x}|}{\lambda} \right),\end{aligned}\quad (26)$$

332 where

$$P_N(x) = \int \frac{d^N u}{(2\pi)^N} e^{-i\vec{u}\cdot\vec{x}} \frac{1}{1 + |\vec{u}|^2}. \quad (27)$$

333 It is important to note that  $P_N$  does not integrate over all available dimensions, but only over  
 334 the last  $N$  dimensions of the space. This in turn means that its argument can only depend on the  
 335 last  $N$  dimensions of any input vector. Returning to the 1 dimensional source, 3 dimensional space  
 336 example,  $P_{3-1}(|\vec{x}|/\lambda)$  should only take the  $y$  and  $z$  components of  $\vec{x}$  into account. The  $x$  component  
 337 is made irrelevant by the translational symmetry of the system along the  $x$ -axis.

338 Moving on to the noise terms, Eq. 23 can be Fourier transformed in space and time to yield

$$-i\omega \bar{c} = -D |\vec{k}|^2 \bar{c} + \bar{\eta}_D - v \bar{c} - \bar{\eta}_v + \bar{\eta}_\beta \implies \bar{c} = \frac{\bar{\eta}_D - \bar{\eta}_v + \bar{\eta}_\beta}{v \left( 1 + \lambda^2 |\vec{k}|^2 - i \frac{\omega}{v} \right)}, \quad (28)$$

339 where  $\eta_\beta(\vec{k}, \omega)$  depends only on the first  $SO$  dimensions of  $k$ -space. Assuming the  $\eta$  terms are all  
 340 independent of each other allows the cross spectrum of  $c$  to be

$$\begin{aligned}\left\langle \bar{c}^*(\vec{k}', \omega') \bar{c}(\vec{k}, \omega) \right\rangle &= \frac{1}{v^2 \left( 1 + \lambda^2 |\vec{k}|^2 - i \frac{\omega}{v} \right) \left( 1 + \lambda^2 |\vec{k}'|^2 + i \frac{\omega'}{v} \right)} \\ &\cdot \left( \left\langle \bar{\eta}_D^*(\vec{k}', \omega') \bar{\eta}_D(\vec{k}, \omega) \right\rangle + \left\langle \bar{\eta}_v^*(\vec{k}', \omega') \bar{\eta}_v(\vec{k}, \omega) \right\rangle + \left\langle \bar{\eta}_\beta^*(\vec{k}', \omega') \bar{\eta}_\beta(\vec{k}, \omega) \right\rangle \right).\end{aligned}\quad (29)$$

341 The cross spectrum of  $\eta_D$  can be obtained from its correlation function. To derive such a  
 342 correlation function, we first consider a separate Markovian system comprised of a 1-dimensional  
 343 lattice of discrete compartments that a diffusing species  $Y$  can exist in. The dimensionality is chosen  
 344 purely for simplicity, as the method outlined below can be easily generalized to higher dimensions  
 345 to produce the same result. Let  $y_i(t)$  be the number of  $Y$  molecules in the  $i$ th compartment at  
 346 time  $t$  and  $d$  be the rate at which these molecules move to the  $i - 1$  or  $i + 1$  compartment. Given a  
 347 sufficiently small time step  $\delta t$ , the probability of a molecule moving from the  $i$ th compartment to  
 348 the  $i \pm 1$  compartment is

$$P(\{y_i(t + \delta t), y_{i\pm 1}(t + \delta t)\} = \{y_i(t) - 1, y_{i\pm 1}(t) + 1\}) = y_i(t) d\delta t. \quad (30)$$

349 Higher order interactions in which multiple molecules are transferred within the time step  $\delta t$   
 350 will have probabilities of order  $(\delta t)^2$  or higher and can thus be ignored. This allows the mean of  
 351  $\delta y_i(t) = y_i(t + \delta t) - y_i(t)$  to take the form

$$\langle \delta y_i(t) \rangle = (y_{i-1}(t) + y_{i+1}(t) - 2y_i(t)) d\delta t, \quad (31)$$

352 where the first two terms come from molecules moving into the  $i$ th compartment from the  $i - 1$  and  
 353  $i + 1$  compartments respectively and the third term comes from the two different ways molecules  
 354 can leave the  $i$ th compartment. As  $\delta t$  is small, each of these transfer processes can be treated  
 355 as being Poissonianly distributed. This allows the variance of  $\delta y_i(t)$  to simply be the right-hand  
 356 side of Eq. 31 but with each term taken to be its absolute value so there are no subtractions.  
 357 Additionally, this approximation allows the covariance between  $\delta y_i$  and  $\delta y_{i\pm 1}$  to be taken as the  
 358 negative of the sum of the expected number of molecules moving from the  $i$ th compartment to the  
 359  $i \pm 1$  compartment and vice versa. With these, the correlation function between  $\delta y_i(t)$  and  $\delta y_j(t)$   
 360 can be written as

$$\langle \delta y_j(t) \delta y_i(t) \rangle = (y_{i-1}(t) + y_{i+1}(t) + 2y_i(t)) d\delta t \delta_{i,j} - (y_i(t) + y_{i-1}(t)) d\delta t \delta_{i-1,j} - (y_i(t) + y_{i+1}(t)) d\delta t \delta_{i+1,j}. \quad (32)$$

361 We now take the system to continuous space by letting  $y_i(t) \rightarrow \ell c(x,t)$  and  $\delta_{i,j} \rightarrow \ell \delta(x - x')$  with  
 362 any instances of  $\pm 1$  in the indices also being converted to  $\pm \ell$ . Putting these substitutions into Eq. 32  
 363 and dividing by  $(\ell \delta t)^2$  yields

$$\begin{aligned} \left\langle \frac{\delta c(x',t)}{\delta t} \frac{\delta c(x,t)}{\delta t} \right\rangle &= \frac{d}{dt} \left( (c(x - \ell, t) + c(x + \ell, t) + 2c(x, t)) \delta(x - x') - (c(x, t) + c(x - \ell, t)) \delta(x - \ell - x') \right. \\ &\quad \left. - (c(x, t) + c(x + \ell, t)) \delta(x + \ell - x') \right) \\ &= \frac{d}{dt} \left( (c(x + \ell, t) \delta(x - x') - c(x + \ell, t) \delta(x + \ell - x')) - (c(x, t) \delta(x - \ell - x') - c(x, t) \delta(x - x')) \right. \\ &\quad \left. (c(x, t) \delta(x - x') - c(x, t) \delta(x + \ell - x')) - (c(x - \ell, t) \delta(x - \ell - x') - c(x - \ell, t) \delta(x - x')) \right). \end{aligned} \quad (33)$$

364 Eq. 33 has been rearranged into this form so as to easily apply the operators  $\partial_x^\pm$  defined as

$$\partial_x^+ f(x) = \frac{f(x + \ell) - f(x)}{\ell}, \quad (34a)$$

365

$$\partial_x^- f(x) = \frac{f(x) - f(x - \ell)}{\ell}. \quad (34b)$$

366

367 Using this notation, Eq. 33 can be simplified into

$$\begin{aligned} \left\langle \frac{\delta c(x',t)}{\delta t} \frac{\delta c(x,t)}{\delta t} \right\rangle &= \frac{\ell d}{dt} \left( \partial_x^+ (c(x, t) \delta(x - \ell - x') - c(x, t) \delta(x - x')) \right. \\ &\quad \left. + \partial_x^- (c(x, t) \delta(x - x') - c(x, t) \delta(x + \ell - x')) \right) \\ &= \frac{\ell^2 d}{dt} \left( \partial_x^+ \partial_{x'}^+ + \partial_x^- \partial_{x'}^- \right) (c(x, t) \delta(x - x')). \end{aligned} \quad (35)$$

368 Taking the  $\ell \rightarrow 0$  limit while holding  $D = \ell^2 d$  constant allows  $\partial_x^\pm$  and  $\partial_{x'}^\pm$  to converge to true  
 369 derivatives,  $\partial_x$  and  $\partial_{x'}$ . Additionally, if the  $\delta c(x', t) / \delta t$  term on the left-hand side of Eq. 35 is replaced  
 370 with  $\delta c(x', t') / \delta t$  for  $t' \neq t$ , then the entire right-hand side must go to 0 as the system is Markovian.  
 371 This can be accomplished by multiplying the right-hand side by a factor of  $\delta_{t,t'}$ . Taking the  $\delta t \rightarrow 0$   
 372 limit then turns the two terms on the left-hand side into true derivatives in time,  $\partial_t$  and  $\partial_{t'}$ , acting on  
 373  $c(x, t)$  and  $c(x', t')$  respectively while the factor of  $\delta_{t,t'} / \delta t$  on the right-hand side becomes  $\delta(t - t')$ .  
 374 Altogether, this transforms Eq. 35 into

$$\langle \partial_{t'} c(x', t') \partial_t c(x, t) \rangle = 2D \delta(t - t') \partial_x \partial_{x'} (c(x, t) \delta(x - x')). \quad (36)$$

375 Finally, by approximating the system as being in steady state,  $c(x, t)$  can be replaced with  $\bar{c}(x)$   
 376 and  $\partial_t c(x, t)$  becomes equivalent to  $\eta_D(x, t)$ . Making these substitutions and generalizing Eq. 36 to  
 377 arbitrary dimensions yields

$$\left\langle \eta_D(\vec{x}', t') \eta_D(\vec{x}, t) \right\rangle = 2D \delta(t - t') \vec{\nabla} \cdot \vec{\nabla}' \left( \bar{c}(\vec{x}) \delta^{SP}(\vec{x} - \vec{x}') \right). \quad (37)$$

378 Fourier transforming Eq. 37 can be easily performed due to the  $\delta$  functions, integrating the spatial  
 379 terms by parts, and utilizing Eq. 24 to yield

$$\begin{aligned} \left\langle \tilde{\eta}_D^*(\vec{k}', \omega') \tilde{\eta}_D(\vec{k}, \omega) \right\rangle &= \int d^{SP}x d^{SP}x' dt dt' e^{i\vec{k}\cdot\vec{x}} e^{-i\vec{k}'\cdot\vec{x}'} e^{i\omega t} e^{-i\omega' t'} \left\langle \eta_D(\vec{x}', t') \eta_D(\vec{x}, t) \right\rangle \\ &= 2D \int d^{SP}x d^{SP}x' dt dt' e^{i\vec{k}\cdot\vec{x}} e^{-i\vec{k}'\cdot\vec{x}'} e^{i\omega t} e^{-i\omega' t'} \delta(t - t') \vec{\nabla} \cdot \vec{\nabla}' \left( \bar{c}(\vec{x}) \delta^{SP}(\vec{x} - \vec{x}') \right) \\ &= 2D \left( 2\pi \delta(\omega - \omega') \right) \int d^{SP}x d^{SP}x' e^{i\vec{k}\cdot\vec{x}} e^{-i\vec{k}'\cdot\vec{x}'} \vec{\nabla} \cdot \vec{\nabla}' \left( \bar{c}(\vec{x}) \delta^{SP}(\vec{x} - \vec{x}') \right) \\ &= 2D \left( 2\pi \delta(\omega - \omega') \right) \int d^{SP}x d^{SP}x' \bar{c}(\vec{x}) \delta^{SP}(\vec{x} - \vec{x}') \vec{\nabla} \cdot \vec{\nabla}' \left( e^{i\vec{k}\cdot\vec{x}} e^{-i\vec{k}'\cdot\vec{x}'} \right) \\ &= 2D \vec{k} \cdot \vec{k}' \left( 2\pi \delta(\omega - \omega') \right) \int d^{SP}x d^{SP}x' \bar{c}(\vec{x}) \delta^{SP}(\vec{x} - \vec{x}') e^{i\vec{k}\cdot\vec{x}} e^{-i\vec{k}'\cdot\vec{x}'} \\ &= 2D \vec{k} \cdot \vec{k}' \left( 2\pi \delta(\omega - \omega') \right) \int d^{SP}x \bar{c}(\vec{x}) e^{i\vec{x}(\vec{k} - \vec{k}')} \\ &= 2D \vec{k} \cdot \vec{k}' \tilde{c}(\vec{k} - \vec{k}') \left( 2\pi \delta(\omega - \omega') \right) \\ &= \frac{2\lambda^2 \vec{k} \cdot \vec{k}'}{1 + \lambda^2 |\vec{k} - \vec{k}'|^2} \left( \beta (2\pi)^{SO+1} \delta(\omega - \omega') \delta^{SO}(\vec{k} - \vec{k}') \right). \end{aligned} \quad (38)$$

380 Moving on to  $\eta_v$ , its correlation function must be  $\delta$  correlated in time and space since it is a  
 381 purely local reaction and as such, at steady state, must take the form

$$\left\langle \eta_v(\vec{x}', t') \eta_v(\vec{x}, t) \right\rangle = v \bar{c}(\vec{x}) \delta(t - t') \delta^{SP}(\vec{x} - \vec{x}'). \quad (39)$$

382 Fourier transforming Eq. 39 is again easily performed due to the  $\delta$  functions and Eq. 24. This yields

$$\begin{aligned} \left\langle \tilde{\eta}_v^*(\vec{k}', \omega') \tilde{\eta}_v(\vec{k}, \omega) \right\rangle &= \int d^{SP}x d^{SP}x' dt dt' e^{i\vec{k}\cdot\vec{x}} e^{-i\vec{k}'\cdot\vec{x}'} e^{i\omega t} e^{-i\omega' t'} \left\langle \eta_v(\vec{x}', t') \eta_v(\vec{x}, t) \right\rangle \\ &= v \int d^{SP}x d^{SP}x' dt dt' e^{i\vec{k}\cdot\vec{x}} e^{-i\vec{k}'\cdot\vec{x}'} e^{i\omega t} e^{-i\omega' t'} \bar{c}(\vec{x}) \delta(t - t') \delta^{SP}(\vec{x} - \vec{x}') \\ &= v \left( 2\pi \delta(\omega - \omega') \right) \int d^{SP}x d^{SP}x' e^{i\vec{k}\cdot\vec{x}} e^{-i\vec{k}'\cdot\vec{x}'} \bar{c}(\vec{x}) \delta^{SP}(\vec{x} - \vec{x}') \\ &= v \left( 2\pi \delta(\omega - \omega') \right) \int d^{SP}x e^{i\vec{x}(\vec{k} - \vec{k}')} \bar{c}(\vec{x}) \\ &= v \tilde{c}(\vec{k} - \vec{k}') \left( 2\pi \delta(\omega - \omega') \right) \\ &= \frac{1}{1 + \lambda^2 |\vec{k} - \vec{k}'|^2} \left( \beta (2\pi)^{SO+1} \delta(\omega - \omega') \delta^{SO}(\vec{k} - \vec{k}') \right). \end{aligned} \quad (40)$$

383 Finally, the cross spectrum of  $\eta_\beta$  must be  $\delta$  correlated in  $\omega$ -space as well as all source dimensions  
 384 of  $k$ -space since it is merely a uniform production term that does not depend on space or time. This  
 385 yields

$$\left\langle \tilde{\eta}_\beta^*(\vec{k}', \omega') \tilde{\eta}_\beta(\vec{k}, \omega) \right\rangle = \beta (2\pi)^{SO+1} \delta(\omega - \omega') \delta^{SO}(\vec{k} - \vec{k}'). \quad (41)$$

386 Combining Eqs. 29, 38, 40, and 41 then yields

$$\begin{aligned}
 \left\langle \tilde{c}^* (\vec{k}', \omega') \tilde{c} (\vec{k}, \omega) \right\rangle &= \frac{\beta (2\pi)^{SO+1} \delta (\omega - \omega') \delta^{SO} (\vec{k} - \vec{k}')}{v^2 \left( 1 + \lambda^2 |\vec{k}|^2 - i \frac{\omega}{v} \right) \left( 1 + \lambda^2 |\vec{k}'|^2 + i \frac{\omega'}{v} \right)} \\
 &\cdot \left( \frac{2\lambda^2 \vec{k} \cdot \vec{k}'}{1 + \lambda^2 |\vec{k} - \vec{k}'|^2} + \frac{1}{1 + \lambda^2 |\vec{k} - \vec{k}'|^2} + 1 \right) \\
 &= \frac{\beta (2\pi)^{SO+1} \delta (\omega - \omega') \delta^{SO} (\vec{k} - \vec{k}')}{v^2 \left( 1 + \lambda^2 |\vec{k}|^2 - i \frac{\omega}{v} \right) \left( 1 + \lambda^2 |\vec{k}'|^2 + i \frac{\omega'}{v} \right)} \frac{2 + \lambda^2 \left( |\vec{k}|^2 + |\vec{k}'|^2 \right)}{1 + \lambda^2 |\vec{k} - \vec{k}'|^2} \\
 &= \frac{\tilde{c} (\vec{k} - \vec{k}') (2\pi \delta (\omega - \omega')) \left( 2 + \lambda^2 \left( |\vec{k}|^2 + |\vec{k}'|^2 \right) \right)}{v \left( 1 + \lambda^2 |\vec{k}|^2 - i \frac{\omega}{v} \right) \left( 1 + \lambda^2 |\vec{k}'|^2 + i \frac{\omega'}{v} \right)}. \tag{42}
 \end{aligned}$$

387 We now define  $m$  as

$$m (\vec{x}, t) = \int_{V(a)} d^{SP} r c (\vec{x} + \vec{r}, t), \tag{43}$$

388 where  $V (a)$  is a  $SP$ -dimensional sphere with radius  $a$ . This allows the mean value of  $m$  to be written  
389 as

$$\begin{aligned}
 \bar{m} (\vec{x}) &= \int_{V(a)} d^{SP} r \bar{c} (\vec{x} + \vec{r}) = \frac{\beta \lambda^{2-(SP-SO)}}{D} \int_{V(a)} d^{SP} r P_{SP-SO} \left( \frac{|\vec{x} + \vec{r}|}{\lambda} \right) \\
 &= \frac{\beta \lambda^{SO}}{v} M_{SP-SO, SP} \left( \frac{|\vec{x}|}{\lambda}, \frac{a}{\lambda} \right), \tag{44}
 \end{aligned}$$

390 where

$$M_{N, N'} (x, y) = \int_{V(y)} d^{N'} u P_N (|\vec{x} + \vec{u}|). \tag{45}$$

391 Since  $P_N (|\vec{x}|)$  can only depend on the last  $N$  dimensions of its input vectors, the same must be  
392 true of  $M_{N, N'}$ . From here we define  $S (\vec{x})$  as the 0-frequency limit of the cross spectrum in  $\omega$ -space  
393 of  $m$ . This allows the time averaged variance,  $\sigma^2 (x)$  to take the form

$$\begin{aligned}
 \sigma^2(x) &= \frac{S(\vec{x})}{T} = \frac{1}{T} \lim_{\omega \rightarrow 0} \int \frac{d\omega'}{2\pi} \left\langle \tilde{\delta m}^*(\vec{x}, \omega') \tilde{\delta m}(\vec{x}, \omega) \right\rangle \\
 &= \frac{1}{T} \lim_{\omega \rightarrow 0} \int \frac{d\omega'}{2\pi} \int_{V(a)} d^{SP} r d^{SP} r' \int \frac{d^{SP} k}{(2\pi)^{SP}} \frac{d^{SP} k'}{(2\pi)^{SP}} e^{-i\vec{k} \cdot (\vec{x} + \vec{r})} e^{i\vec{k}' \cdot (\vec{x} + \vec{r}')} \left\langle \tilde{\delta c}^*(\vec{k}', \omega') \tilde{\delta c}(\vec{k}, \omega) \right\rangle \\
 &= \frac{1}{(2\pi)^{2SP} \nu T} \int_{V(a)} d^{SP} r d^{SP} r' \int d^{SP} k d^{SP} k' e^{-i\vec{k} \cdot (\vec{x} + \vec{r})} e^{i\vec{k}' \cdot (\vec{x} + \vec{r}')} \\
 &\quad \cdot \frac{\tilde{c}(\vec{k} - \vec{k}') \left( 2 + \lambda^2 \left( |\vec{k}|^2 + |\vec{k}'|^2 \right) \right)}{\left( 1 + \lambda^2 |\vec{k}|^2 \right) \left( 1 + \lambda^2 |\vec{k}'|^2 \right)} \\
 &= \frac{1}{(2\pi)^{2SP} \nu T} \int_{V(a)} d^{SP} r d^{SP} r' \int d^{SP} k d^{SP} k' d^{SP} z e^{-i\vec{k} \cdot (\vec{x} + \vec{r})} e^{i\vec{k}' \cdot (\vec{x} + \vec{r}')} e^{i\vec{z} \cdot (\vec{k} - \vec{k}')} \\
 &\quad \cdot \tilde{c}(\vec{z}) \frac{2 + \lambda^2 \left( |\vec{k}|^2 + |\vec{k}'|^2 \right)}{\left( 1 + \lambda^2 |\vec{k}|^2 \right) \left( 1 + \lambda^2 |\vec{k}'|^2 \right)} \\
 &= \frac{1}{(2\pi)^{2SP} \nu T} \int_{V(a)} d^{SP} r d^{SP} r' \int d^{SP} k d^{SP} k' d^{SP} z e^{-i\vec{k} \cdot (\vec{x} + \vec{r} - \vec{z})} e^{i\vec{k}' \cdot (\vec{x} + \vec{r}' - \vec{z})} \\
 &\quad \cdot \tilde{c}(\vec{z}) \left( \frac{1}{1 + \lambda^2 |\vec{k}|^2} + \frac{1}{1 + \lambda^2 |\vec{k}'|^2} \right) \\
 &= \frac{1}{(2\pi)^{2SP} \nu T} \int_{V(a)} d^{SP} r d^{SP} r' \int d^{SP} z \tilde{c}(\vec{z}) \left( \int d^{SP} k e^{-i\vec{k} \cdot (\vec{x} + \vec{r} - \vec{z})} \frac{(2\pi)^{SP} \delta^{SP}(\vec{x} + \vec{r}' - \vec{z})}{1 + \lambda^2 |\vec{k}|^2} \right. \\
 &\quad \left. + \int d^{SP} k' e^{i\vec{k}' \cdot (\vec{x} + \vec{r}' - \vec{z})} \frac{(2\pi)^{SP} \delta^{SP}(\vec{x} + \vec{r} - \vec{z})}{1 + \lambda^2 |\vec{k}'|^2} \right) \\
 &= \frac{\beta \lambda^{2-(SP-SO)}}{D \nu \lambda^{SP} T} \int_{V(a)} d^{SP} r d^{SP} r' \int d^{SP} z P_{SP-SO} \left( \frac{|\vec{z}|}{\lambda} \right) \\
 &\quad \cdot \left( \delta^{SP}(\vec{x} + \vec{r}' - \vec{z}) P_{SP} \left( \frac{|\vec{x} + \vec{r} - \vec{z}|}{\lambda} \right) + \delta^{SP}(\vec{x} + \vec{r} - \vec{z}) P_{SP} \left( \frac{|\vec{x} + \vec{r}' - \vec{z}|}{\lambda} \right) \right) \\
 &= \frac{\beta \lambda^{4-(2SP-SO)}}{D^2 T} \int_{V(a)} d^{SP} r d^{SP} r' P_{SP} \left( \frac{|\vec{r} - \vec{r}'|}{\lambda} \right) \left( P_{SP-SO} \left( \frac{|\vec{x} + \vec{r}|}{\lambda} \right) + P_{SP-SO} \left( \frac{|\vec{x} + \vec{r}'|}{\lambda} \right) \right) \\
 &= \frac{\beta \lambda^{4-(SP-SO)}}{D^2 T} \left( \int_{V(a)} d^{SP} r M_{SP,SP} \left( \frac{|\vec{r}|}{\lambda}, \frac{a}{\lambda} \right) P_{SP-SO} \left( \frac{|\vec{x} + \vec{r}|}{\lambda} \right) \right. \\
 &\quad \left. + \int_{V(a)} d^{SP} r' M_{SP,SP} \left( \frac{|\vec{r}'|}{\lambda}, \frac{a}{\lambda} \right) P_{SP-SO} \left( \frac{|\vec{x} + \vec{r}'|}{\lambda} \right) \right) \\
 &= \frac{2\beta \lambda^{4-(SP-SO)}}{D^2 T} \int_{V(a)} d^{SP} r M_{SP,SP} \left( \frac{|\vec{r}|}{\lambda}, \frac{a}{\lambda} \right) P_{SP-SO} \left( \frac{|\vec{x} + \vec{r}|}{\lambda} \right) \\
 &= \frac{2\beta \lambda^{SO}}{\nu^2 T} \Sigma_{SP-SO,SP} \left( \frac{|\vec{x}|}{\lambda}, \frac{a}{\lambda} \right) = \frac{2\bar{m}(\vec{x})}{\nu T} \frac{\Sigma_{SP-SO,SP} \left( \frac{|\vec{x}|}{\lambda}, \frac{a}{\lambda} \right)}{M_{SP-SO,SP} \left( \frac{|\vec{x}|}{\lambda}, \frac{a}{\lambda} \right)}, \tag{46}
 \end{aligned}$$

394 where

$$\Sigma_{N,N'}(x, y) = \int_{V(y)} d^{N'} u M_{N',N'}(u, y) P_N(|\vec{x} + \vec{u}|). \quad (47)$$

395 Wherein once again only the last  $N$  dimensions of the input vectors can be taken into account.

396 Combining Eqs. 44 and 46 yields the full precision to be

$$P^2(\vec{x}) = \frac{\bar{m}^2(\vec{x})}{\sigma^2(\vec{x})} \left( \frac{\Delta \bar{m}(\vec{x})}{\bar{m}(\vec{x})} \right)^2 = \frac{T}{2\tau} \frac{\beta}{\nu} M_{SP-SO,SP} \left( \frac{|\vec{x}|}{\lambda}, \frac{a}{\lambda} \right) \left( 1 - \frac{M_{SP-SO,SP} \left( \frac{|\vec{x}|+2a}{\lambda}, \frac{a}{\lambda} \right)}{M_{SP-SO,SP} \left( \frac{|\vec{x}|}{\lambda}, \frac{a}{\lambda} \right)} \right)^2, \quad (48)$$

397 where

$$\tau = \frac{1}{\nu} \frac{\Sigma_{SP-SO,SP} \left( \frac{|\vec{x}|}{\lambda}, \frac{a}{\lambda} \right)}{M_{SP-SO,SP} \left( \frac{|\vec{x}|}{\lambda}, \frac{a}{\lambda} \right)}. \quad (49)$$

398 With Eq. 48, once the forms of  $P_N$ ,  $M_{N,N'}$ , and  $\Sigma_{N,N'}$  are determined for a given  $SP$  and  $SO$ , the full  
399 form of the noise-to-signal ratio can be found. We now calculate these forms for specific choices of  
400  $SP$  and  $SO$ .

#### 401 **1D space, 0D source**

402 To begin, we start with the simple scenario in which  $SP = 1$  and  $SO = 0$ . This allows  $P_1$ ,  $M_{1,1}$ , and  
403  $\Sigma_{1,1}$  to take the forms

$$P_1(x) = \int \frac{du}{2\pi} e^{-iux} \frac{1}{1+u^2} = \frac{1}{2} e^{-|x|} \quad (50)$$

$$\begin{aligned} M_{1,1}(x, y) &= \int_{-y}^y du P_1(|x+u|) = \frac{1}{2} \int_{-y}^y du e^{-|x+u|} \\ &= \begin{cases} 1 - e^{-y} \cosh(x) & x < y \\ e^{-x} \sinh(y) & x \geq y \end{cases} \end{aligned} \quad (51)$$

$$\begin{aligned} \Sigma_{1,1}(x, y) &= \int_{-y}^y du M_{1,1}(u, y) P_1(|x+u|) = \frac{1}{2} \int_{-y}^y du (1 - e^{-y} \cosh(u)) e^{-|x+u|} \\ &= \begin{cases} 1 - \frac{1}{4} e^{-y} \left( (5 + 2y - e^{-2y}) \cosh(x) - 2x \sinh(x) \right) & x < y \\ \frac{1}{4} e^{-x} \left( 4 \sinh(y) - e^{-y} (2y + \sinh(2y)) \right) & x \geq y \end{cases} \end{aligned} \quad (52)$$

404 Eqs. 51 and 52 can then be put into Eq. 48 along with the assumption  $|x| > a$  to obtain

$$P^2(x) = \frac{\bar{m}(x) T}{2\tau} \left( 1 - e^{-\frac{2a}{\lambda}} \right)^2, \quad (53)$$

405 and

$$\tau = \frac{1}{\nu} \left( 1 - e^{-\frac{a}{\lambda}} \frac{\frac{2a}{\lambda} + \sinh\left(\frac{2a}{\lambda}\right)}{4 \sinh\left(\frac{a}{\lambda}\right)} \right) \quad (54)$$

406 as in Eqs. 9 and 10 of the main text.

407 Next we apply the condition given by Eq. 17 to determine the regime in which these results are  
408 valid for the  $SP = 1$  and  $SO = 0$  case. A similar methodology can be done for each of the other



409 cases we will look at, though this is the only one we do explicitly. To begin, we will reperform the  
410 calculation done in Eq. 46 but without taking the  $\omega \rightarrow 0$  limit so as to obtain the full form of  $S(\omega, x)$ .

$$\begin{aligned}
 S(\omega, x) &= \int \frac{d\omega'}{2\pi} \langle \tilde{\delta m}^*(x, \omega') \tilde{\delta m}(x, \omega) \rangle \\
 &= \int \frac{d\omega'}{2\pi} \int_{-a}^a dr dr' \int \frac{dk}{2\pi} \frac{dk'}{2\pi} e^{-ik(x+r)} e^{ik'(x+r')} \langle \tilde{\delta c}^*(k', \omega') \tilde{\delta c}(k, \omega) \rangle \\
 &= \frac{1}{(2\pi)^2 v} \int_{-a}^a dr dr' \int dk dk' e^{-ik(x+r)} e^{ik'(x+r')} \frac{\tilde{c}(k-k') \left(2 + \lambda^2 (k^2 + k'^2)\right)}{\left(1 + \lambda^2 k^2 - i\frac{\omega}{v}\right) \left(1 + \lambda^2 k'^2 + i\frac{\omega}{v}\right)} \\
 &= \frac{1}{(2\pi)^2 v} \int_{-a}^a dr dr' \int dk dk' dz e^{-ik(x+r)} e^{ik'(x+r')} e^{iz(k-k')} \bar{c}(z) \frac{2 + \lambda^2 (k^2 + k'^2)}{\left(1 + \lambda^2 k^2 - i\frac{\omega}{v}\right) \left(1 + \lambda^2 k'^2 + i\frac{\omega}{v}\right)} \\
 &= \frac{1}{(2\pi)^2 v} \int_{-a}^a dr dr' \int dk dk' dz e^{-ik(x+r-z)} e^{ik'(x+r'-z)} \bar{c}(z) \left( \frac{1}{1 + \lambda^2 k^2 - i\frac{\omega}{v}} + \frac{1}{1 + \lambda^2 k'^2 + i\frac{\omega}{v}} \right) \\
 &= \frac{1}{(2\pi)^2 v} \int_{-a}^a dr dr' \int dz \bar{c}(z) \left( \int dk e^{-ik(x+r-z)} \frac{2\pi\delta(x+r'-z)}{1 + \lambda^2 k^2 - i\frac{\omega}{v}} + \int dk' e^{ik'(x+r'-z)} \frac{2\pi\delta(x+r-z)}{1 + \lambda^2 k'^2 + i\frac{\omega}{v}} \right) \\
 &= \frac{1}{2\pi v} \int_{-a}^a dr dr' \left( \int dk e^{-ik(r-r')} \frac{\bar{c}(x+r')}{1 + \lambda^2 k^2 - i\frac{\omega}{v}} + \int dk e^{ik(r'-r)} \frac{\bar{c}(x+r)}{1 + \lambda^2 k^2 + i\frac{\omega}{v}} \right) \\
 &= \frac{1}{v\lambda} \int_{-a}^a dr dr' \left( \bar{c}(x+r') \mathcal{Q}\left(\frac{r-r'}{\lambda}, -\frac{\omega}{v}\right) + \bar{c}(x+r) \mathcal{Q}\left(\frac{r-r'}{\lambda}, \frac{\omega}{v}\right) \right), \tag{55}
 \end{aligned}$$

411 where

$$\mathcal{Q}(x, y) = \int \frac{du}{2\pi} e^{-iux} \frac{1}{1 + iy + u^2} = \frac{1}{2\sqrt{1 + iy}} e^{-|x|\sqrt{1 + iy}} \tag{56}$$

412 and  $\sqrt{1 + iy}$  is assumed to be the branch with a positive real component. Plugging this and the  
413 explicit form of  $\bar{c}$  into Eq. 55 then yields

$$\begin{aligned}
 S(\omega, x) &= \frac{\beta}{4vD} \int_{-a}^a dr dr' \left( \frac{1}{\sqrt{1 - i\frac{\omega}{v}}} e^{-\frac{|x+r'|}{\lambda}} e^{-\frac{|r-r'|}{\lambda}} \sqrt{1 - i\frac{\omega}{v}} + \frac{1}{\sqrt{1 + i\frac{\omega}{v}}} e^{-\frac{|x+r|}{\lambda}} e^{-\frac{|r-r'|}{\lambda}} \sqrt{1 + i\frac{\omega}{v}} \right) \\
 &= \frac{\beta}{2vD} \text{Re} \left[ \int_{-a}^a dr dr' \frac{1}{\sqrt{1 + i\frac{\omega}{v}}} e^{-\frac{|x+r|}{\lambda}} e^{-\frac{|r-r'|}{\lambda}} \sqrt{1 + i\frac{\omega}{v}} \right] = \frac{2\beta}{v^2} \text{Re} \left[ \Upsilon \left( \frac{|x|}{\lambda}, \frac{a}{\lambda}, \sqrt{1 + i\frac{\omega}{v}} \right) \right], \tag{57}
 \end{aligned}$$

414 where

$$\Upsilon(x, y, w) = \int_{-y}^y du du' \frac{1}{4w} e^{-|x+u|} e^{-u|u-r'|}. \tag{58}$$

415 The function  $\Upsilon(x, y, w)$  limits to  $\Sigma_{1,1}(x, y)$  when  $w \rightarrow 1$  and as such has different forms when  $x$   
416 is less or greater than  $y$ . As the purpose of this exercise is to determine the regime in which our  
417 theoretical approximations are valid and our model obeys  $|x| \geq 2a$  for all cells, here we will only  
418 present the  $x > y$  solution for simplicity. Using this to perform the integrals in Eq. 58 and applying  
419 the result to Eq. 57 then yields

$$S(\omega, x) = \frac{2\beta}{v^2} e^{-\frac{|x|}{\lambda}} \text{Re} \left[ \frac{1}{W^2} \sinh\left(\frac{a}{\lambda}\right) - e^{-\frac{a}{\lambda}W} \frac{W \sinh\left(\frac{a}{\lambda}W\right) \cosh\left(\frac{a}{\lambda}\right) - \cosh\left(\frac{a}{\lambda}W\right) \sinh\left(\frac{a}{\lambda}\right)}{W^2 (W^2 - 1)} \right], \tag{59}$$

420 where  $W = \sqrt{1 + i\frac{\omega}{v}}$ , which in turn implies  $\omega = -iv(W^2 - 1)$ . With this, it is easier to perform all  
 421 further calculations with respect to  $W$  and take the  $W \rightarrow 1$  limit as that is equivalent to the  $\omega \rightarrow 0$   
 422 limit.

423 We can now combine this with the known form of  $S(0, x)$  given in Eq. 46 to evaluate Eq. 17 to  
 424 take the form

$$T^2 \gg \left| \frac{6}{S} \frac{\partial^2 S}{\partial \omega^2} \Big|_{\omega=0} \right| = \left| \frac{6}{S} \frac{\partial W}{\partial \omega} \frac{\partial}{\partial W} \left( \frac{\partial W}{\partial \omega} \frac{\partial S}{\partial W} \right) \Big|_{W=1} \right| = \left| \frac{6}{S} \left( \left( \frac{\partial \omega}{\partial W} \right)^{-2} \frac{\partial^2 S}{\partial W^2} - \left( \frac{\partial \omega}{\partial W} \right)^{-3} \frac{\partial^2 \omega}{\partial W^2} \frac{\partial S}{\partial W} \right) \Big|_{W=1} \right|$$

$$= \frac{1}{2v^2} \frac{96 \sinh\left(\frac{a}{\lambda}\right) - e^{-\frac{a}{\lambda}} \left( 48 \frac{a}{\lambda} + 30 \left(\frac{a}{\lambda}\right)^2 + 8 \left(\frac{a}{\lambda}\right)^3 + 33 \sinh\left(2\frac{a}{\lambda}\right) \right) + 6e^{-3\frac{a}{\lambda}} \left( 3\frac{a}{\lambda} + \left(\frac{a}{\lambda}\right)^2 \right)}{4 \sinh\left(\frac{a}{\lambda}\right) - e^{-\frac{a}{\lambda}} \left( 2\frac{a}{\lambda} + \sinh\left(2\frac{a}{\lambda}\right) \right)}. \quad (60)$$

425 The right-hand side of Eq. 60 is a function that monotonically increases from  $9/2v^2$  to  $21/2v^2$  as  
 426  $a/\lambda$  goes from 0 to  $\infty$ . Thus, regardless of the value of  $\lambda$ ,  $v$  sets the timescale to which  $T$  must be  
 427 compared.

### 428 2D space, 0D source

429 For  $SP = 2$  and  $SO = 0$ ,  $P_2$ ,  $M_{2,2}$ , and  $\Sigma_{2,2}$  each take the form

$$P_2(x) = \int \frac{d^2 u}{(2\pi)^2} e^{-i\vec{u}\cdot\vec{x}} \frac{1}{1+|\vec{u}|^2} = \frac{1}{2\pi} K_0(x) \quad (61)$$

$$M_{2,2}(x, y) = \int_{V(y)} d^2 u P_2(|\vec{x} + \vec{u}|) = \int_{V(y)} d^2 u \int \frac{d^2 u'}{(2\pi)^2} e^{-i\vec{u}'\cdot(\vec{x}+\vec{u})} \frac{1}{1+|\vec{u}'|^2}$$

$$= y \int_0^\infty du' \frac{J_0(xu') J_1(yu')}{1+u'^2} \quad (62)$$

$$\Sigma_{2,2}(x, y) = \int_{V(y)} d^2 u M_{2,2}(|\vec{u}|, y) P_2(|\vec{x} + \vec{u}|)$$

$$= y \int_{V(y)} d^2 u \int_0^\infty du' \int \frac{d^2 u''}{(2\pi)^2} \frac{J_0(|\vec{u}|u') J_1(yu') e^{-i\vec{u}''\cdot(\vec{x}+\vec{u})}}{1+u'^2 1+|\vec{u}''|^2}$$

$$= y^2 \int_0^\infty du' du'' \frac{u'' J_0(xu'') J_1(yu') (u' J_0(yu'') J_1(yu') - u'' J_0(yu') J_1(yu''))}{(u'^2 - u''^2) (1+u'^2) (1+u''^2)}, \quad (63)$$

430 where  $J_n(x)$  and  $K_n(x)$  are the Bessel functions of the first kind and modified Bessel functions of  
 431 the second kind respectively. Unfortunately, the complicated nature of Bessel functions makes the  
 432 remaining integrals unsolvable analytically, and therefore we evaluate them numerically. Similar  
 433 problems arise whenever  $SP = 2$  or  $SP - SO = 2$ .

### 434 3D space, 0D source

435 For  $SP = 3$  and  $SO = 0$ ,  $P_3$ ,  $M_{3,3}$ , and  $\Sigma_{3,3}$  each take the form

$$P_3(x) = \int \frac{d^3 u}{(2\pi)^3} e^{-i\vec{u}\cdot\vec{x}} \frac{1}{1+|\vec{u}|^2} = \frac{1}{4\pi x} e^{-x} \quad (64)$$

$$M_{3,3}(x, y) = \int_{V(y)} d^3 u P_3(|\vec{x} + \vec{u}|) = \frac{1}{4\pi} \int_{V(y)} d^3 u \frac{1}{|\vec{x} + \vec{u}|} e^{-|\vec{x}+\vec{u}|}$$

$$= \begin{cases} 1 - \frac{1+y}{x} e^{-y} \sinh(x) & x < y \\ \frac{1}{x} e^{-x} (y \cosh(y) - \sinh(y)) & x \geq y \end{cases} \quad (65)$$

$$\begin{aligned}
 \Sigma_{3,3}(x, y) &= \int_{V(y)} d^3u M_{3,3}(|\vec{u}|, y) P_3(|\vec{x} + \vec{u}|) \\
 &= \frac{1}{4\pi} \int_{V(y)} d^3u \left( 1 - \frac{1+y}{|\vec{u}|} e^{-y} \sinh(|\vec{u}|) \right) \frac{1}{|\vec{x} + \vec{u}|} e^{-|\vec{x} + \vec{u}|} \\
 &= \begin{cases} 1 - \frac{1}{4x} e^{-y} (1+y) \left( (5+2y+e^{-2y}) \sinh(x) - 2x \cosh(x) \right) & x < y \\ \frac{1}{4x} e^{-x} \left( 4(y \cosh(y) - \sinh(y)) + e^{-y} (1+y) (2y - \sinh(2y)) \right) & x \geq y \end{cases} \quad (66)
 \end{aligned}$$

### 436 2D space, 1D source

437 For  $SP = 2$ ,  $SO = 1$ ,  $P_1$  and  $M_{2,2}$  are known from Eqs. 50 and 62. This leaves  $M_{1,2}$  and  $\Sigma_{1,2}$  to take  
438 the forms

$$\begin{aligned}
 M_{1,2}(x, y) &= \int_{V(y)} d^2u P_1(|\vec{x} + \vec{u}|) = \frac{1}{2} \int_0^y du \int_0^{2\pi} d\theta u e^{-|x_2+u_2|} \\
 &= e^{-|x_2|} \int_0^{2\pi} d\theta \frac{1 - e^{-y \sin(\theta)} (1 + y \sin(\theta))}{2 (\sin(\theta))^2} \quad (67)
 \end{aligned}$$

$$\Sigma_{1,2}(x, y) = \int_{V(y)} d^2u M_{2,2}(|\vec{u}|, y) P_1(|\vec{x} + \vec{u}|) = \frac{y}{2} \int_0^y du \int_0^{2\pi} d\theta \int_0^\infty du' u \frac{J_0(uu') J_1(yu')}{1+u'^2} e^{-|x_2+u \sin(\theta)|} \quad (68)$$

439 Again, we evaluate the remaining integrals numerically.

### 440 3D space, 2D source

441 For  $SP = 3$ ,  $SO = 2$ ,  $P_1$  and  $M_{3,3}$  are known from Eqs. 50 and 65. This leaves  $M_{1,3}$  and  $\Sigma_{1,3}$  to take  
442 the forms

$$\begin{aligned}
 M_{1,3}(x, y) &= \int_{V(y)} d^3u P_1(|\vec{x} + \vec{u}|) = \frac{1}{2} \int_{V(y)} d^3u e^{-|x_3+u_3|} \\
 &= 2\pi \begin{cases} e^{-y} (1+y) \cosh(x) + \frac{y^2-x^2}{2} - 1 & x < y \\ e^{-x} (y \cosh(y) - \sinh(y)) & x \geq y \end{cases} \quad (69)
 \end{aligned}$$

$$\begin{aligned}
 \Sigma_{1,3}(x, y) &= \int_{V(y)} d^3u M_{3,3}(|\vec{u}|, y) P_1(|\vec{x} + \vec{u}|) = \frac{1}{2} \int_{V(y)} d^3u \left( 1 - \frac{1+y}{|\vec{u}|} e^{-y} \sinh(|\vec{u}|) \right) e^{-|x_3+u_3|} \\
 &= 2\pi \begin{cases} e^{-y} (1+y) \left( \frac{7+2y+e^{-2y}}{4} \cosh(x) - \frac{x}{2} \sinh(x) - \cosh(y) \right) + \frac{y^2-x^2}{2} - 1 & x < y \\ e^{-x} \left( \frac{4y^2+5y-1}{8} e^{-y} + \frac{1+y}{8} e^{-3y} + \frac{3y}{4} \cosh(y) - \frac{5}{4} \sinh(y) \right) & x \geq y \end{cases} \quad (70)
 \end{aligned}$$

### 443 Appendix 2: Hopping model for SDC case

444 To obtain a more intuitive understanding of why the SDC model results in the scaling properties  
445 seen in the various calculations of  $M_{SP-SO,SP}$  and  $\Sigma_{SP-SO,SP}$ , we now look at a simpler version of  
446 one dimensional diffusion in which we discretize space into compartments of uniform size. Let  
447 molecules still be produced in the 0th compartment at rate  $\beta$  and degrade anywhere in space at  
448 rate  $\nu$ . The process of diffusion can be approximated by letting the molecules hop to neighboring  
449 compartments with rate  $h$  with equal probability of moving left or right. This allows the dynamics of  
450  $m_j$ , the number of molecules in the  $j$  compartment for  $j \in \mathbb{Z}$ , to be written as

$$\frac{\partial m_j}{\partial t} = \beta \delta_{0j} + h (m_{j+1} + m_{j-1} - 2m_j) - \nu m_j. \quad (71)$$

451 By setting the left-hand side of Eq. 71 to 0, the resulting system of equations can be easily solved  
 452 by assuming  $\bar{m}_j = A \exp(-2|j|/\lambda)$  and calculating  $A$  and  $\lambda$ . Imposing this assumption on Eq. 71 and  
 453 taking  $j > 0$  yields

$$\begin{aligned} 0 &= h \left( A e^{-\frac{2(j+1)}{\lambda}} + A e^{-\frac{2(j-1)}{\lambda}} - 2A e^{-\frac{2j}{\lambda}} \right) - \nu A e^{-\frac{2j}{\lambda}} = A e^{-\frac{2j}{\lambda}} \left( h e^{-\frac{2}{\lambda}} + h e^{\frac{2}{\lambda}} - 2h - \nu \right) \\ &= A e^{-\frac{2j}{\lambda}} \left( 4h \sinh^2 \left( \frac{1}{\lambda} \right) - \nu \right) \implies \lambda = \operatorname{asinh}^{-1} \left( \sqrt{\frac{\nu}{4h}} \right). \end{aligned} \quad (72)$$

454 With  $\lambda$  solved for, we solve for the proportionality constant by noting that the total number of  
 455 molecules in the whole system must follow a simple birth-death process with a mean of  $\beta/\nu$ . This in  
 456 turn implies

$$\begin{aligned} \frac{\beta}{\nu} &= \sum_{j=-\infty}^{\infty} A e^{-\frac{2|j|}{\lambda}} = A \left( 2 \left( \sum_{j=0}^{\infty} e^{-\frac{2j}{\lambda}} \right) - 1 \right) = A \left( \frac{2}{1 - e^{-\frac{2}{\lambda}}} - 1 \right) = A \left( \frac{e^{\frac{1}{\lambda}}}{\sinh \left( \frac{1}{\lambda} \right)} - 1 \right) = A \coth \left( \frac{1}{\lambda} \right) \\ \implies A &= \frac{\beta}{\nu} \tanh \left( \frac{1}{\lambda} \right), \end{aligned} \quad (73)$$

457 This in turn gives the average value of  $m_j$  to be

$$\bar{m}_j = \frac{\beta}{\nu} \tanh \left( \frac{1}{\lambda} \right) e^{-\frac{2|j|}{\lambda}}. \quad (74)$$

458 Next, we calculate the full distribution of  $m_j$  by assuming that at any given moment in time each  
 459 molecule in the system has probability  $P_j$  of being in the  $j$ th compartment. This can be combined  
 460 with the aforementioned fact that  $N$ , the total number of molecules in the system, must follow  
 461 a birth-death process and thus to Poissonianly distributed with mean  $\beta/\nu$ . For any given value  
 462 of  $N$ ,  $P(m_j|N)$  must be a binomial distribution with success probability  $P_j$  since each molecule is  
 463 independent. This allows the marginal distribution  $P(m_j)$  to be calculated to be

$$\begin{aligned} P(m_j) &= \sum_{N=m_j}^{\infty} P(N) P(m_j|N) = \sum_{N=m_j}^{\infty} e^{-\frac{\beta}{\nu}} \frac{\left(\frac{\beta}{\nu}\right)^N}{N!} \binom{N}{m_j} P_j^{m_j} (1 - P_j)^{N - m_j} \\ &= e^{-\frac{\beta}{\nu}} \frac{\left(\frac{\beta}{\nu} P_j\right)^{m_j}}{m_j!} \sum_{N=m_j}^{\infty} \frac{\left(\frac{\beta}{\nu} (1 - P_j)\right)^{N - m_j}}{(N - m_j)!} = e^{-\frac{\beta}{\nu}} \frac{\left(\frac{\beta}{\nu} P_j\right)^{m_j}}{m_j!} e^{\frac{\beta}{\nu} (1 - P_j)} = e^{-\frac{\beta}{\nu} P_j} \frac{\left(\frac{\beta}{\nu} P_j\right)^{m_j}}{m_j!}. \end{aligned} \quad (75)$$

464 Thus,  $m_j$  is seen to be Poissonianly distributed with mean  $\beta P_j/\nu$ . Comparing this mean to that  
 465 derived in Eq. 74 then implies

$$P_j = \tanh \left( \frac{1}{\lambda} \right) e^{-\frac{2|j|}{\lambda}}. \quad (76)$$

466 We now consider the joint distribution of  $m_j$  and  $m_k$  for  $j \neq k$ . Since molecules cannot be in the  
 467  $j$ th and  $k$ th compartment simultaneously, the joint conditional distribution  $P(m_j, m_k|N)$  must be  
 468 trinomially distributed. This allows for the joint distribution to be calculated in a manner similar to  
 469 Eq. 75 to produce

$$\begin{aligned}
 P(m_j, m_k) &= \sum_{N=m_j+m_k}^{\infty} P(N) P(m_j, m_k | N) = \sum_{N=m_j+m_k}^{\infty} e^{-\frac{\beta}{\nu}} \frac{\left(\frac{\beta}{\nu}\right)^N}{N!} \binom{N}{m_j, m_k} P_j^{m_j} P_k^{m_k} (1 - P_j - P_k)^{N-m_j-m_k} \\
 &= e^{-\frac{\beta}{\nu}} \frac{\left(\frac{\beta}{\nu} P_j\right)^{m_j}}{m_j!} \frac{\left(\frac{\beta}{\nu} P_k\right)^{m_k}}{m_k!} \sum_{N=m_j+m_k}^{\infty} \frac{\left(\frac{\beta}{\nu} (1 - P_j - P_k)\right)^{N-m_j-m_k}}{(N - m_j - m_k)!} \\
 &= e^{-\frac{\beta}{\nu}} \frac{\left(\frac{\beta}{\nu} P_j\right)^{m_j}}{m_j!} \frac{\left(\frac{\beta}{\nu} P_k\right)^{m_k}}{m_k!} e^{\frac{\beta}{\nu} (1 - P_j - P_k)} = \left( e^{-\frac{\beta}{\nu} P_j} \frac{\left(\frac{\beta}{\nu} P_j\right)^{m_j}}{m_j!} \right) \left( e^{-\frac{\beta}{\nu} P_k} \frac{\left(\frac{\beta}{\nu} P_k\right)^{m_k}}{m_k!} \right). \tag{77}
 \end{aligned}$$

470 Thus the joint probability distribution of  $m_j$  and  $m_k$  is seen to be separable into the product of the  
 471 two marginal distribution, meaning that same-time, instantaneous measurements of  $m_j$  and  $m_k$  must  
 472 be uncorrelated.

473 From here we can begin to calculate the full correlation function for  $m_j$  and  $m_k$ . We start by  
 474 defining  $\delta m_j(t) = m_j(t) - \bar{m}_j$  and  $\delta m_k(t) = m_k(t) - \bar{m}_k$ . Since  $\bar{m}_j$  is known to set the right-hand side of Eq.  
 475 71 to 0, the dynamics of  $\delta m_j$  can be written as

$$\frac{\partial \delta m_j}{\partial t} = h (\delta m_{j+1} + \delta m_{j-1} - 2\delta m_j) - \nu \delta m_j, \tag{78}$$

476 with the same being true for  $\delta m_k$ . Additionally, we assume the system is at steady state so that all  
 477 mean expressions are invariant to time translation. Given this, we can without loss of generality  
 478 take the correlation function between  $\delta m_j$  and  $\delta m_k$  to have the form

$$C_{j,k}(t) = \langle \delta m_k(t) \delta m_j(0) \rangle, \tag{79}$$

479 where  $t > 0$ . Applying the dynamic result given in Eq. 78 then yields

$$\begin{aligned}
 \frac{\partial C_{j,k}}{\partial t} &= \left\langle \frac{\partial \delta m_k(t)}{\partial t} \delta m_j(0) \right\rangle = \left\langle \left( h (\delta m_{k+1}(t) + \delta m_{k-1}(t) - 2\delta m_k(t)) - \nu \delta m_k(t) \right) \delta m_j(0) \right\rangle \\
 &= h (C_{j,k+1} + C_{j,k-1}) - (2h + \nu) C_{j,k}. \tag{80}
 \end{aligned}$$

480 The final form of Eq. 80 can be split into the term  $-(2h + \nu)C_{j,k}$  which implies  $C_{j,k} \propto \exp(-(2h + \nu)t)$   
 481 and the term  $h(C_{j,k+1} + C_{j,k-1})$  which is the recursion relation for  $I_{\ell}(2ht)$ , the modified Bessel function  
 482 of the first kind, where  $\ell$  is some function of  $j$  and  $k$ . This means  $C_{j,k}(t)$  can be written as

$$C_{j,k}(t) = A I_{\ell(j,k)}(2ht) e^{-(2h+\nu)t}, \tag{81}$$

483 for some proportionality constant  $A$ .

484 To determine the forms of  $A$  and  $\ell(j, k)$ , we can utilize the initial condition that  $m_j$  is Poissonianly  
 485 distributed and thus has a variance equal to its mean while being completely uncorrelated with  $m_k$   
 486 when both are measured at the same time. This means  $C_{j,k}(0)$  can be written as

$$C_{j,k}(0) = \frac{\beta}{\nu} P_j \delta_{jk}, \tag{82}$$

487 which in turn implies  $\ell(j, j) = 0$  as  $I_n(0) = \delta_{0n}$  for  $n \in \mathbb{Z}$ . To satisfy the recursion relation term of Eq.  
 488 80, it must then be the case that  $\ell(j, j + n) = n$ . Setting  $k = j + n$  thus yields  $\ell(j, k) = k - j$ . Since  $k$   
 489 and  $j$  are integers,  $\ell(j, k) = j - k$  is equally valid as  $I_n = I_{-n}$  again for  $n \in \mathbb{Z}$ . Combining these results  
 490 together yields the final form of  $C_{j,k}(t)$  to be

$$C_{j,k}(t) = \frac{\beta}{\nu} P_j I_{k-j}(2ht) e^{-(2h+\nu)t}. \tag{83}$$

491 Next, let  $\tau$  be the autocorrelation time of  $m_j$ . This quantity is typically defined by integrating  
492  $C_{j,j}(t)/C_{j,j}(0)$  over all time. Using the known properties of modified Bessel functions, this can be  
493 solved to yield

$$\tau = \int_0^{\infty} dt \frac{C_{j,j}(t)}{C_{j,j}(0)} = \int_0^{\infty} dt I_0(2ht) e^{-(2h+\nu)t} = \frac{1}{\sqrt{\nu(4h+\nu)}}. \quad (84)$$

494 If we now define  $M = T/\tau$  where  $M$  is the number of effectively independent measurements that  
495 can be made in a time  $T$ , we see that for  $h \gg \nu$ ,  $M \approx 2\sqrt{\nu h T}$ . Additionally, from Eq. 72 we see  
496 that in the  $h \gg \nu$  regime  $\lambda \approx 2\sqrt{h/\nu}$ . By equating this  $\lambda$  to the nondimensionalized  $\lambda_{SDC}/a$  from the  
497 SDC model we see that  $M \approx \lambda \nu T = (\lambda_{SDC}/a) \nu T$ . This is consistent with the fact that for  $\lambda_{SDC} \gg a$  the  
498 right-hand side of Eq. 54 becomes approximately  $a/\lambda_{SDC} \nu$ , which allows  $M = T/\tau_{SDC} \approx (\lambda_{SDC}/a) \nu T$ .

499 In the  $h \ll \nu$  regime we find  $M \approx \nu T$ . Once again, this consistent with Eq. 54 when  $\lambda_{SDC} \ll a$  as  
500 this causes the right-hand side to become approximately  $\nu^{-1}$ . Thus, the SDC model is seen to have  
501 a correlation time that agrees with Eq. 84 in both the large and small  $h$  regime.

### 502 Appendix 3: Comparison to experimental data

503 To compare our theory to experimental data, we focus on ten of the morphogens presented in  
504 Table 1 of *Kicheva et al. (2012)* and obtain data from the references therein. For Bicoid, we obtain  
505 a value of  $\lambda$  of  $\sim 100 \mu\text{m}$  from the text of *Gregor et al. (2007b)* with an error of  $\pm 10 \mu\text{m}$  from the  
506 finding in *Gregor et al. (2007a)* that cells have a  $\sim 10\%$  error in measuring the Bicoid gradient. We  
507 then take the  $a$  value of the *Drosophila* embryo cells that are subjected to the Bicoid gradient to be  
508  $\sim 2.8 \mu\text{m}$  based on Fig. 3A of *Gregor et al. (2007a)*. We use the same figure to estimate the size of the  
509 whole embryo to be  $\sim 500 \mu\text{m}$  or  $\sim 90$  cells. This value of  $a$  is also used for Dorsal as measurements  
510 of both Bicoid and Dorsal occur in the *Drosophila* embryo at nuclear cycle 14. For the value of  $\lambda$  for  
511 Dorsal, we use Fig. 3D from *Liberman et al. (2009)* to obtain a full width at 60% max of  $45 \pm 10 \mu\text{m}$ .  
512 Since this represents the width of Gaussian fit on both sides of the source whereas our model uses  
513 an exponential profile, we assume the appropriate  $\lambda$  value for such an exponential fit would be half  
514 this value,  $22.5 \pm 5 \mu\text{m}$ . Fig. 3A from the same source also shows that the distance from the ventral  
515 midline to the dorsal midline is  $\sim 200 \mu\text{m}$  or  $\sim 35$  cells.

516 For Dpp and Wg, *Kicheva et al. (2007)* provides explicit measurements of  $\lambda$  for each. These  
517 values are  $20.2 \pm 5.7 \mu\text{m}$  and  $5.8 \pm 2.04 \mu\text{m}$  respectively. For Hh, we use Fig. S2C in the supplementary  
518 material of *Wartlick et al. (2011)* to determine  $\lambda$  to be  $8 \pm 3 \mu\text{m}$ . Dpp, Wg, and Hh all occur in the  
519 wing disc during the third instar of the *Drosophila* development. As such, we use a common value  
520 of  $a$  for all three. This value is taken to be  $1.3 \mu\text{m}$  based on the area of the cells being reported as  
521  $5.5 \pm 0.8 \mu\text{m}^2$  in the supplementary material of *Kicheva et al. (2007)* and the assumption that the  
522 cells are circular. Additionally, the scale bar for Fig. 1A in *Wartlick et al. (2011)* shows the maximal  
523 distance from the morphogen producing midline of the wing disc to its edge to be  $\sim 250 \mu\text{m}$  or  $\sim 100$   
524 cells.

525 The  $\lambda$  value of Fgf8 is reported as being  $197 \pm 7 \mu\text{m}$  in *Yu et al. (2009)*. Additionally, based off  
526 the scale bars seen in Fig. 2C-E of *Yu et al. (2009)*, we estimate the value of  $a$  for the cells to be  
527  $\sim 10 \mu\text{m}$ . For the morphogens involved in the Nodal/Lefty system (cyclops, squint, lefty1, and lefty2),  
528 measurements of  $\lambda$  for each are taken from Fig. 2C-F of *Müller et al. (2012)* by observing where  
529 the average of the three curves crosses the 37% of max threshold with error bars given by the  
530 width of the region in which the vertical error bars of each plot intersect this threshold line. We  
531 assume the  $a$  value of each morphogen in the Nodal/Lefty system to be equivalent to the  $a$  value of  
532 cells in the Fgf8 measurements performed in *Yu et al. (2009)*. This is because the measurements  
533 made in *Müller et al. (2012)* were taken during the blastula stage of the zebrafish development  
534 while measurements taken in *Yu et al. (2009)* were taken in the sphere germ ring stage. These stages  
535 occur at  $\sim 2.25$  and  $\sim 5.67$  hpf respectively, but the blastula stage can last until  $\sim 6$  hpf based on  
536 the timeline of zebrafish development presented in *Kimmel et al. (1995)*. As such, since there is

537 potential overlap in the time frame of these two stages, we assume the cells maintain a relatively  
 538 fixed size and thus that the value of  $a$  for the Nodal/Lefty system can be taken as the same value of  
 539  $a$  used for Fgf8. Additionally, as seen in Figs. 8F and 11B in *Kimmel et al. (1995)*, these two stages  
 540 also share a roughly equal overall diameter of the embryo of  $\sim 500\mu\text{m}$  at the largest point. This  
 541 creates a circumference of  $\sim 1600\mu\text{m}$  or  $\sim 80$  cells, which in turn means the morphogen must travel  
 542 a maximum distance of  $\sim 40$  cells away from the source.

| Morphogen | Organism          | $\lambda$ ( $\mu\text{m}$ ) | $a$ ( $\mu\text{m}$ ) | $N$ |
|-----------|-------------------|-----------------------------|-----------------------|-----|
| Bicoid    | <i>Drosophila</i> | $100\pm 10$                 | 2.8                   | 90  |
| Fgf8      | Zebrafish         | $197\pm 7$                  | 10                    | 40  |
| Lefty2    | Zebrafish         | $150\pm 25$                 | 10                    | 40  |
| Lefty1    | Zebrafish         | $115\pm 20$                 | 10                    | 40  |
| Dpp       | <i>Drosophila</i> | $20.2\pm 5.7$               | 1.3                   | 100 |
| Dorsal    | <i>Drosophila</i> | $22.5\pm 5$                 | 2.8                   | 35  |
| Squint    | Zebrafish         | $65\pm 10$                  | 10                    | 40  |
| Cyclops   | Zebrafish         | $30\pm 5$                   | 10                    | 40  |
| Hh        | <i>Drosophila</i> | $8\pm 3$                    | 1.3                   | 100 |
| Wg        | <i>Drosophila</i> | $5.8\pm 2.04$               | 1.3                   | 100 |

## 544 References

- 545 **Akiyama T**, Gibson MC. Morphogen transport: theoretical and experimental controversies. *Wiley Interdisci-*  
 546 *plinary Reviews: Developmental Biology*. 2015; 4(2):99–112.
- 547 **Berezhevskii AM**, Sample C, Shvartsman SY. Formation of morphogen gradients: Local accumulation time.  
 548 *Physical Review E*. 2011; 83(5):051906.
- 549 **Berg HC**, Purcell EM. Physics of chemoreception. *Biophysical journal*. 1977; 20(2):193–219.
- 550 **Bischoff M**, Gradilla AC, Seijo I, Andrés G, Rodríguez-Navas C, González-Méndez L, Guerrero I. Cytonemes are  
 551 required for the establishment of a normal Hedgehog morphogen gradient in *Drosophila* epithelia. *Nature*  
 552 *cell biology*. 2013; 15(11):1269.
- 553 **Bressloff PC**, Kim H. Bidirectional transport model of morphogen gradient formation via cytonemes. *Physical*  
 554 *biology*. 2018; .
- 555 **Carrell SN**, O'Connell MD, Jacobsen T, Pomeroy AE, Hayes SM, Reeves GT. A facilitated diffusion mechanism  
 556 establishes the *Drosophila* Dorsal gradient. *Development*. 2017; 144(23):4450–4461.
- 557 **Chen W**, Huang H, Hatori R, Kornberg TB. Essential basal cytonemes take up Hedgehog in the *Drosophila* wing  
 558 imaginal disc. *Development*. 2017; 144(17):3134–3144.
- 559 **De Lachapelle AM**, Bergmann S. Precision and scaling in morphogen gradient read-out. *Molecular systems*  
 560 *biology*. 2010; 6(1):351.
- 561 **Driever W**, Nüsslein-Volhard C. The bicoid protein determines position in the *Drosophila* embryo in a  
 562 concentration-dependent manner. *Cell*. 1988; 54(1):95–104.
- 563 **Dubuis JO**, Tkačik G, Wieschaus EF, Gregor T, Bialek W. Positional information, in bits. *Proceedings of the*  
 564 *National Academy of Sciences*. 2013; 110(41):16301–16308.
- 565 **Ellery AJ**, Simpson MJ, McCue SW, Baker RE. Characterizing transport through a crowded environment with  
 566 different obstacle sizes. *The Journal of chemical physics*. 2014; 140(5):02B601\_1.
- 567 **Erdmann T**, Howard M, Ten Wolde PR. Role of spatial averaging in the precision of gene expression patterns.  
 568 *Physical review letters*. 2009; 103(25):258101.
- 569 **Fancher S**, Mugler A. Fundamental limits to collective concentration sensing in cell populations. *Physical review*  
 570 *letters*. 2017; 118(7):078101.
- 571 **Fanelli D**, McKane AJ. Diffusion in a crowded environment. *Physical Review E*. 2010; 82(2):021113.

- 572 **Gardiner CW**. Handbook of stochastic methods for physics, chemistry, and the natural sciences. 3rd ed.. ed.  
573 Springer series in synergetics (Unnumbered), Berlin ; New York: Springer; 2004.
- 574 **Gierer A**, Meinhardt H. A theory of biological pattern formation. *Kybernetik*. 1972; 12(1):30–39.
- 575 **Gillespie DT**. The chemical Langevin equation. *The Journal of Chemical Physics*. 2000; 113(1):297–306.
- 576 **Gregor T**, Tank DW, Wieschaus EF, Bialek W. Probing the limits to positional information. *Cell*. 2007; 130(1):153–  
577 164.
- 578 **Gregor T**, Wieschaus EF, McGregor AP, Bialek W, Tank DW. Stability and nuclear dynamics of the bicoid mor-  
579 phogen gradient. *Cell*. 2007; 130(1):141–152.
- 580 **Grimm O**, Coppey M, Wieschaus E. Modelling the Bicoid gradient. *Development*. 2010; 137(14):2253–2264.
- 581 **Houchmandzadeh B**, Wieschaus E, Leibler S. Establishment of developmental precision and proportions in the  
582 early *Drosophila* embryo. *Nature*. 2002; 415(6873):798.
- 583 **Huang H**, Kornberg TB. Myoblast cytonemes mediate Wg signaling from the wing imaginal disc and Delta-Notch  
584 signaling to the air sac primordium. *Elife*. 2015; 4:e06114.
- 585 **Kanodia JS**, Rikhy R, Kim Y, Lund VK, DeLotto R, Lippincott-Schwartz J, Shvartsman SY. Dynamics of the Dorsal  
586 morphogen gradient. *Proceedings of the National Academy of Sciences*. 2009; 106(51):21707–21712.
- 587 **Kicheva A**, Bollenbach T, Wartlick O, Jülicher F, Gonzalez-Gaitan M. Investigating the principles of morphogen  
588 gradient formation: from tissues to cells. *Current opinion in genetics & development*. 2012; 22(6):527–532.
- 589 **Kicheva A**, Pantazis P, Bollenbach T, Kalaidzidis Y, Bittig T, Jülicher F, Gonzalez-Gaitan M. Kinetics of morphogen  
590 gradient formation. *Science*. 2007; 315(5811):521–525.
- 591 **Kimmel CB**, Ballard WW, Kimmel SR, Ullmann B, Schilling TF. Stages of embryonic development of the zebrafish.  
592 *Developmental dynamics*. 1995; 203(3):253–310.
- 593 **Kornberg TB**. Cytonemes and the dispersion of morphogens. *Wiley Interdisciplinary Reviews: Developmental*  
594 *Biology*. 2014; 3(6):445–463.
- 595 **Kornberg TB**, Roy S. Cytonemes as specialized signaling filopodia. *Development*. 2014; 141(4):729–736.
- 596 **Lander AD**, Nie Q, Wan FY. Do morphogen gradients arise by diffusion? *Developmental cell*. 2002; 2(6):785–796.
- 597 **Lieberman LM**, Reeves GT, Stathopoulos A. Quantitative imaging of the Dorsal nuclear gradient reveals limitations  
598 to threshold-dependent patterning in *Drosophila*. *Proceedings of the National Academy of Sciences*. 2009;  
599 106(52):22317–22322.
- 600 **Müller P**, Rogers KW, Jordan BM, Lee JS, Robson D, Ramanathan S, Schier AF. Differential diffusivity of Nodal  
601 and Lefty underlies a reaction-diffusion patterning system. *Science*. 2012; 336(6082):721–724.
- 602 **Müller P**, Rogers KW, Shuizi RY, Brand M, Schier AF. Morphogen transport. *Development*. 2013; 140(8):1621–  
603 1638.
- 604 **Rogers KW**, Müller P. Nodal and BMP dispersal during early zebrafish development. *Developmental biology*.  
605 2018; .
- 606 **Rogers KW**, Schier AF. Morphogen gradients: from generation to interpretation. *Annual review of cell and*  
607 *developmental biology*. 2011; 27:377–407.
- 608 **Sanders TA**, Llagostera E, Barna M. Specialized filopodia direct long-range transport of SHH during vertebrate  
609 tissue patterning. *Nature*. 2013; 497(7451):628.
- 610 **Shvartsman SY**, Baker RE. Mathematical models of morphogen gradients and their effects on gene expression.  
611 *Wiley Interdisciplinary Reviews: Developmental Biology*. 2012; 1(5):715–730.
- 612 **Stanganello E**, Scholpp S. Role of cytonemes in Wnt transport. *J Cell Sci*. 2016; 129(4):665–672.
- 613 **Teimouri H**, Kolomeisky AB. New model for understanding mechanisms of biological signaling: Direct transport  
614 via cytonemes. *The journal of physical chemistry letters*. 2015; 7(1):180–185.
- 615 **Teimouri H**, Kolomeisky AB. Mechanisms of the formation of biological signaling profiles. *Journal of Physics A:*  
616 *Mathematical and Theoretical*. 2016; 49(48):483001.



- 617 **Tostevin F**, Ten Wolde PR, Howard M. Fundamental limits to position determination by concentration gradients.  
618 PLoS computational biology. 2007; 3(4):e78.
- 619 **Varenes J**, Fancher S, Han B, Mugler A. Emergent versus individual-based multicellular chemotaxis. Physical  
620 review letters. 2017; 119(18):188101.
- 621 **Wartlick O**, Mumcu P, Kicheva A, Bittig T, Seum C, Jülicher F, Gonzalez-Gaitan M. Dynamics of Dpp signaling and  
622 proliferation control. Science. 2011; 331(6021):1154–1159.
- 623 **Wilcockson SG**, Sutcliffe C, Ashe HL. Control of signaling molecule range during developmental patterning.  
624 Cellular and Molecular Life Sciences. 2017; 74(11):1937–1956.
- 625 **Yu SR**, Burkhardt M, Nowak M, Ries J, Petrášek Z, Scholpp S, Schwille P, Brand M. Fgf8 morphogen gradient  
626 forms by a source-sink mechanism with freely diffusing molecules. Nature. 2009; 461(7263):533.

# A Direct Transport (DT)

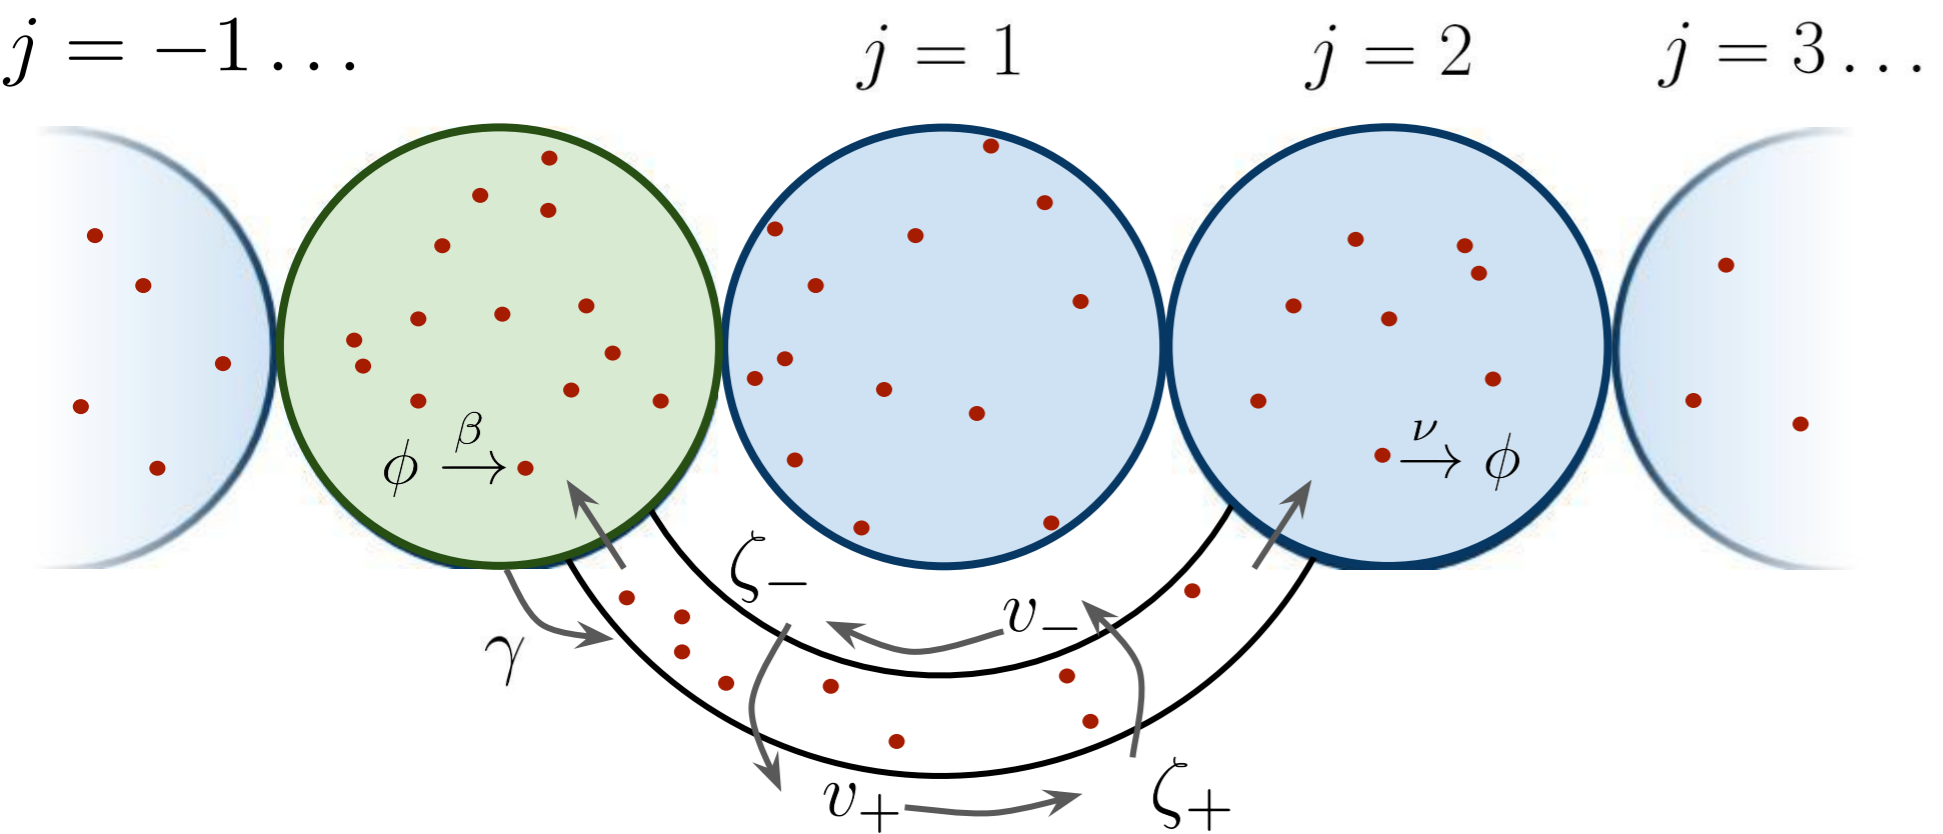

# B Synthesis-Diffusion-Clearance (SDC)

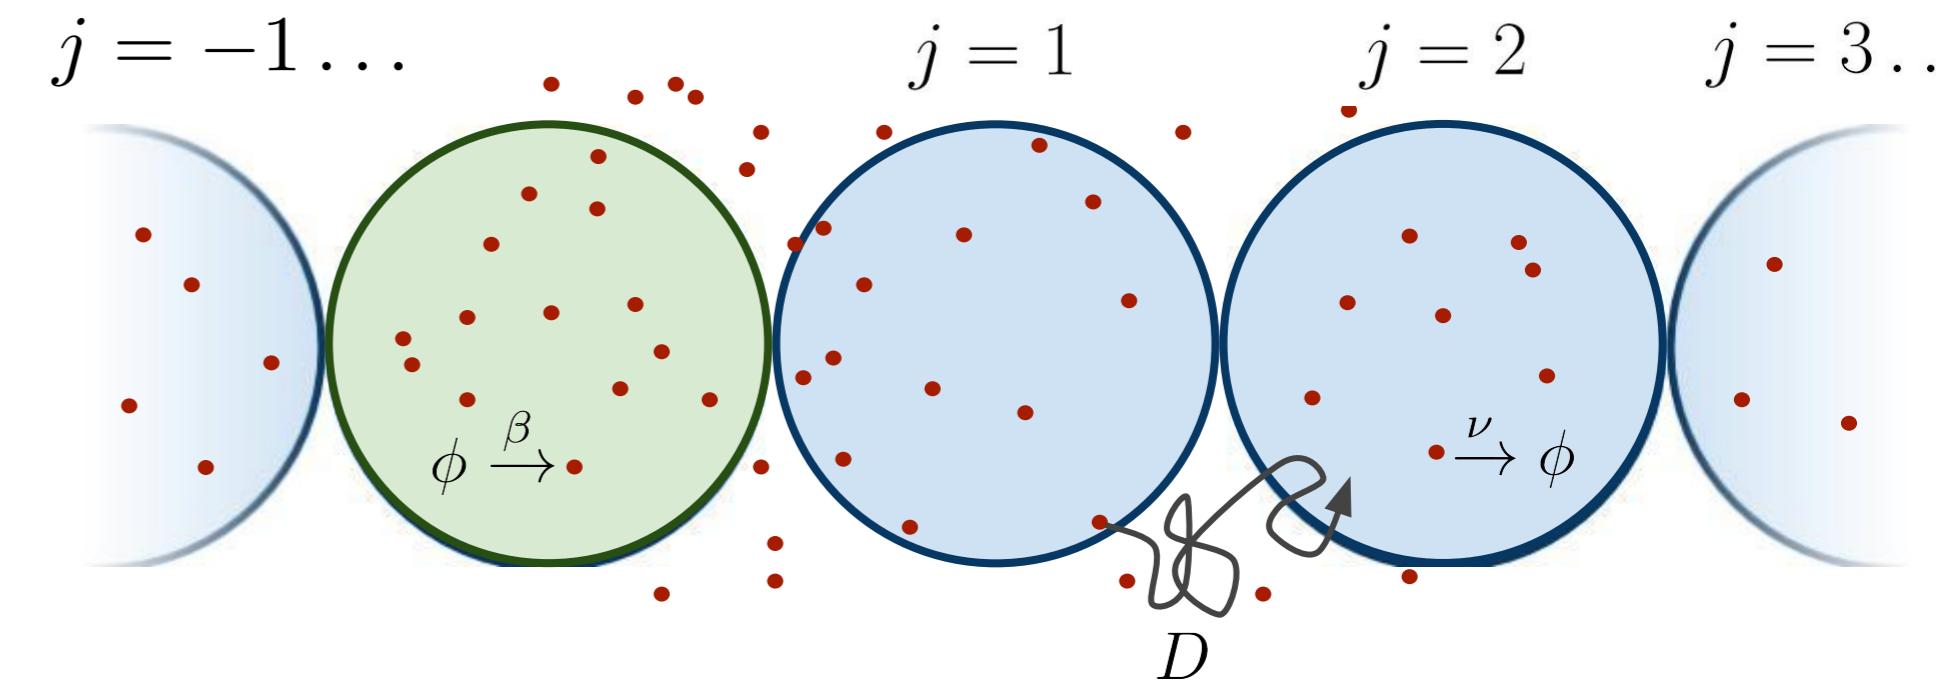

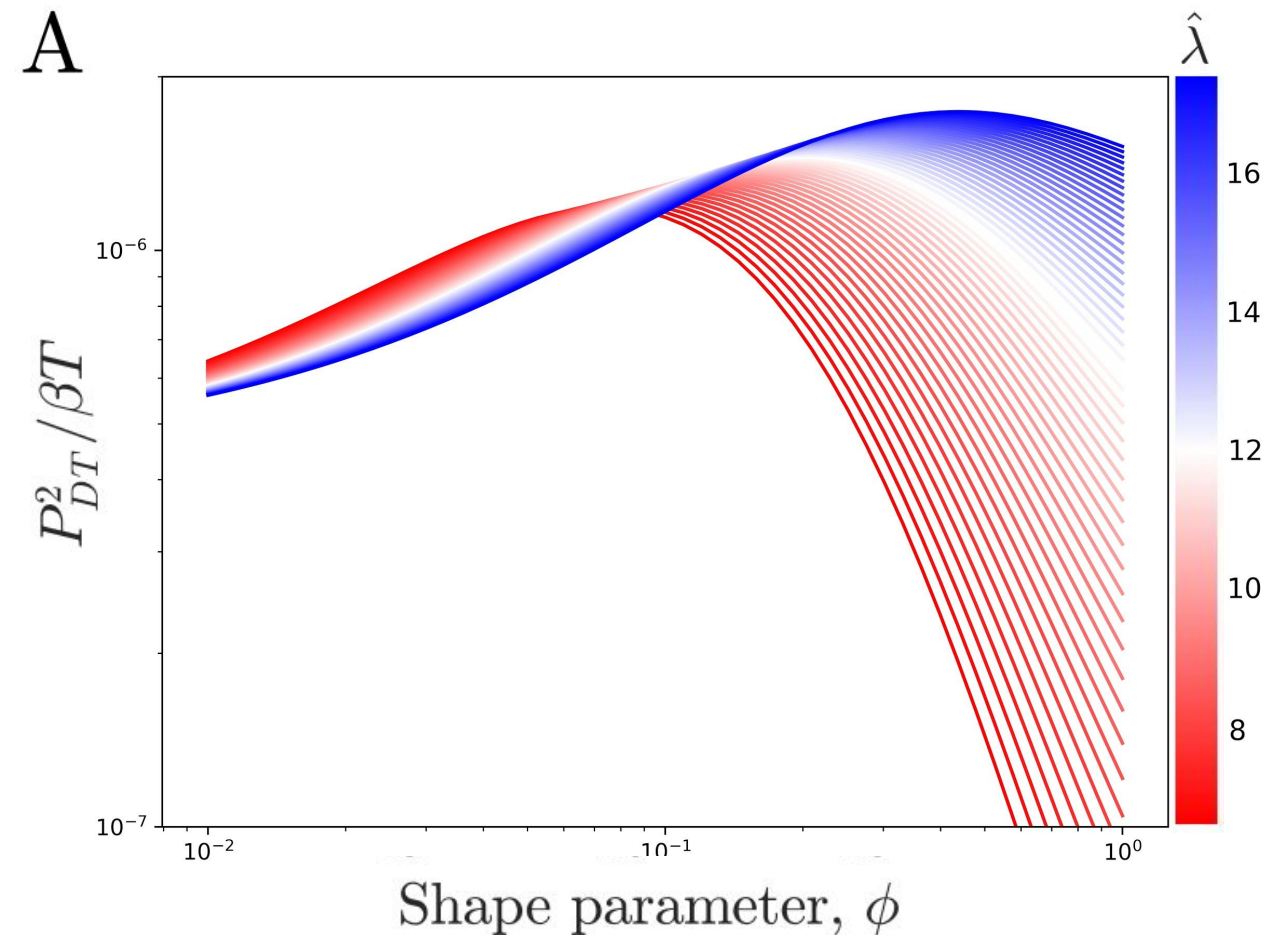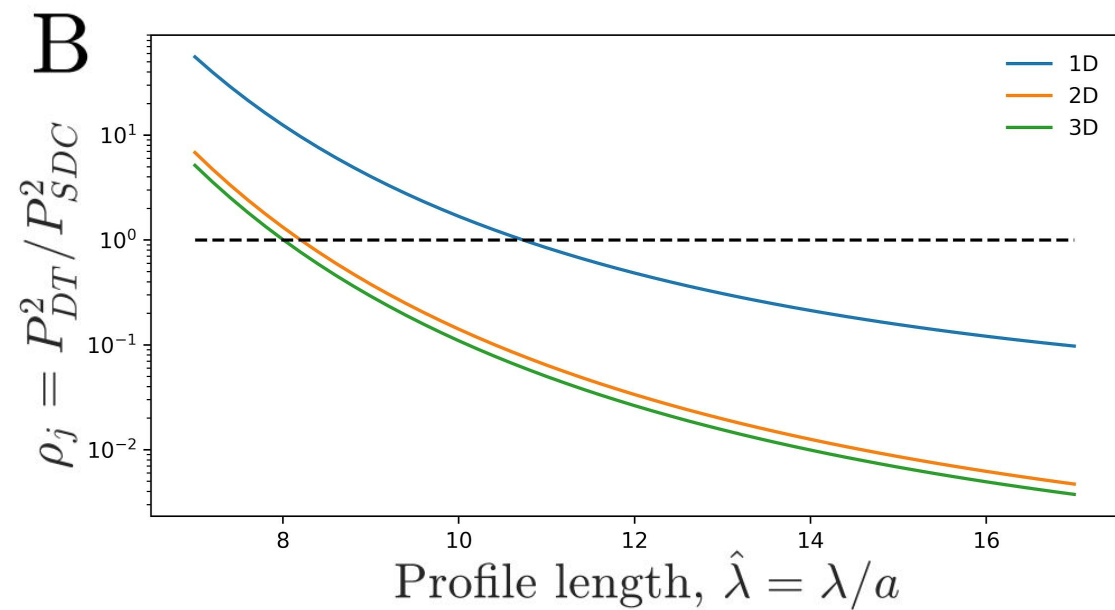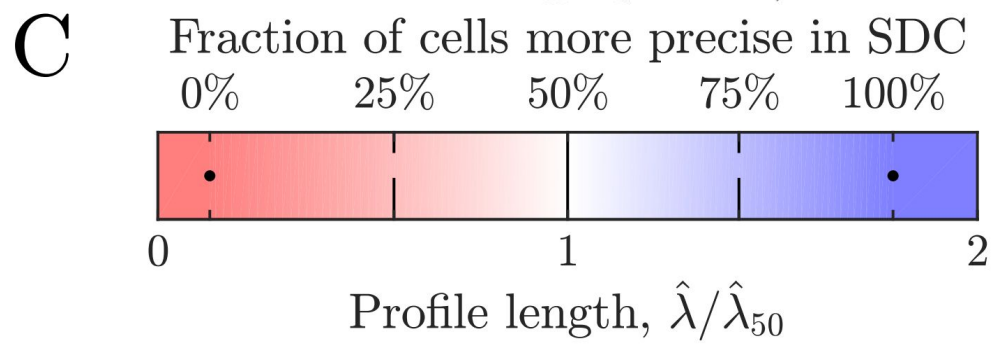

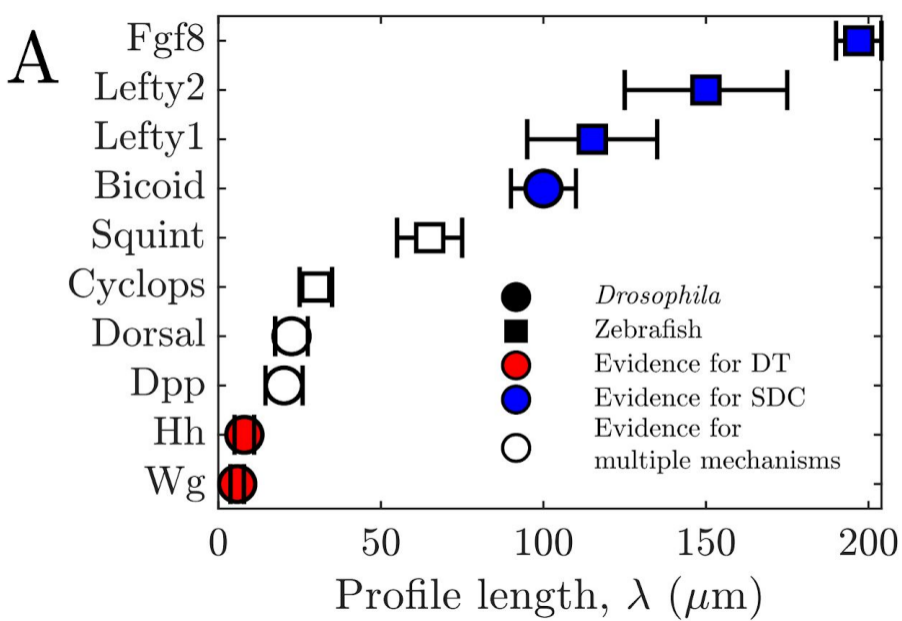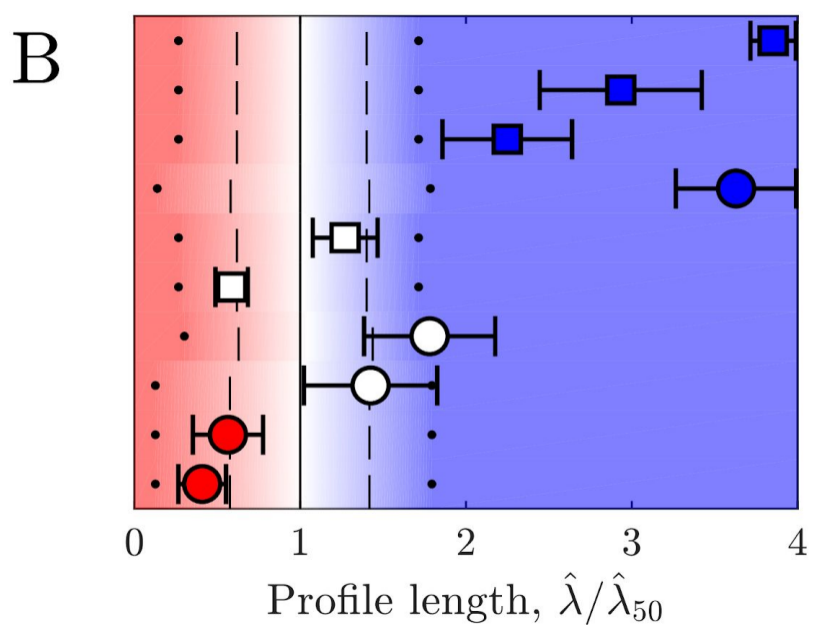

Source: https://www.biorxiv.org/content/10.1101/2020.06.09.141937v1.full.pdf
